# Supplementary material for: Comparative Risk of Renal Adverse Events in Patients Receiving Immune Checkpoint Inhibitors: A Bayesian Network Meta-Analysis
Source: PubMed Central journal article supplement (PMC8242344; doi:10.3389/fonc.2021.662731), 2021-06-16
Supplement: DataSheet_1.pdf [file DataSheet_1.pdf]

# Comparative risk of renal adverse events in patients receiving immune checkpoint inhibitors: A Bayesian Network Meta-analysis

## Supplemental materials

|                                                                                                  |    |
|--------------------------------------------------------------------------------------------------|----|
| <b>Supplemental Figure 1.</b> Incidence of RAEs among different kinds of treatment regimens..... | 1  |
| <b>Supplemental Figure 2.</b> Risk of bias assessments of all included trials.....               | 2  |
| <b>Supplemental Figure 3.</b> Comparison-adjusted funnel plots of publication bias test.....     | 3  |
| <b>Supplemental Figure 4.</b> Network plots.....                                                 | 4  |
| <b>Supplemental Figure 5.</b> Ranking probabilities curves for RAEs.....                         | 5  |
| <b>Supplemental Figure 6.</b> Ranking probabilities curves for AKI.....                          | 6  |
| <b>Supplemental Figure 7.</b> Rankings of SUCRA.....                                             | 7  |
| <b>Supplemental Figure 8.</b> Assessment of transitivity.....                                    | 8  |
| <b>Supplemental Figure 9.</b> Evaluation of local inconsistency using Loop-specific method.....  | 9  |
| <b>Supplemental Figure 10.</b> The distribution of SUCRA values stratified by cancer types.....  | 10 |
| <b>Table S1.</b> PRISMA NMA Checklist.....                                                       | 11 |
| <b>Table S2.</b> Search strategy.....                                                            | 15 |
| <b>Table S3.</b> FDA-approved doses of immune checkpoint inhibitors.....                         | 16 |
| <b>Table S4.</b> Main characteristics of the trials included in this meta-analysis.....          | 17 |
| <b>Table S5.</b> Results of traditional pairwise meta-analysis for RAEs.....                     | 24 |
| <b>Table S6.</b> Network estimates of treatment comparisons for AKI and grade 3-5 AKI.....       | 25 |
| <b>Table S7.</b> Evaluation of the model fit.....                                                | 26 |
| <b>Table S8.</b> Evaluation of local inconsistency using node-split model.....                   | 27 |
| <b>Table S9.</b> Subgroup analyses and meta-regression.....                                      | 28 |
| <b>Table S10.</b> SUCRA values stratified by cancer types.....                                   | 29 |
| <b>Table S11.</b> Sensitivity analyses.....                                                      | 30 |

**Supplemental Figure 1.** Incidence of RAEs among different kinds of treatment regimens. *RAEs, renal adverse events; AKI, acute kidney injury; TTD, Targeted therapy drug; Chemo, Chemotherapy; PD-1, programmed cell death 1; PD-L1, programmed cell death ligand 1; CTLA4, cytotoxic T-lymphocyte antigen 4.*

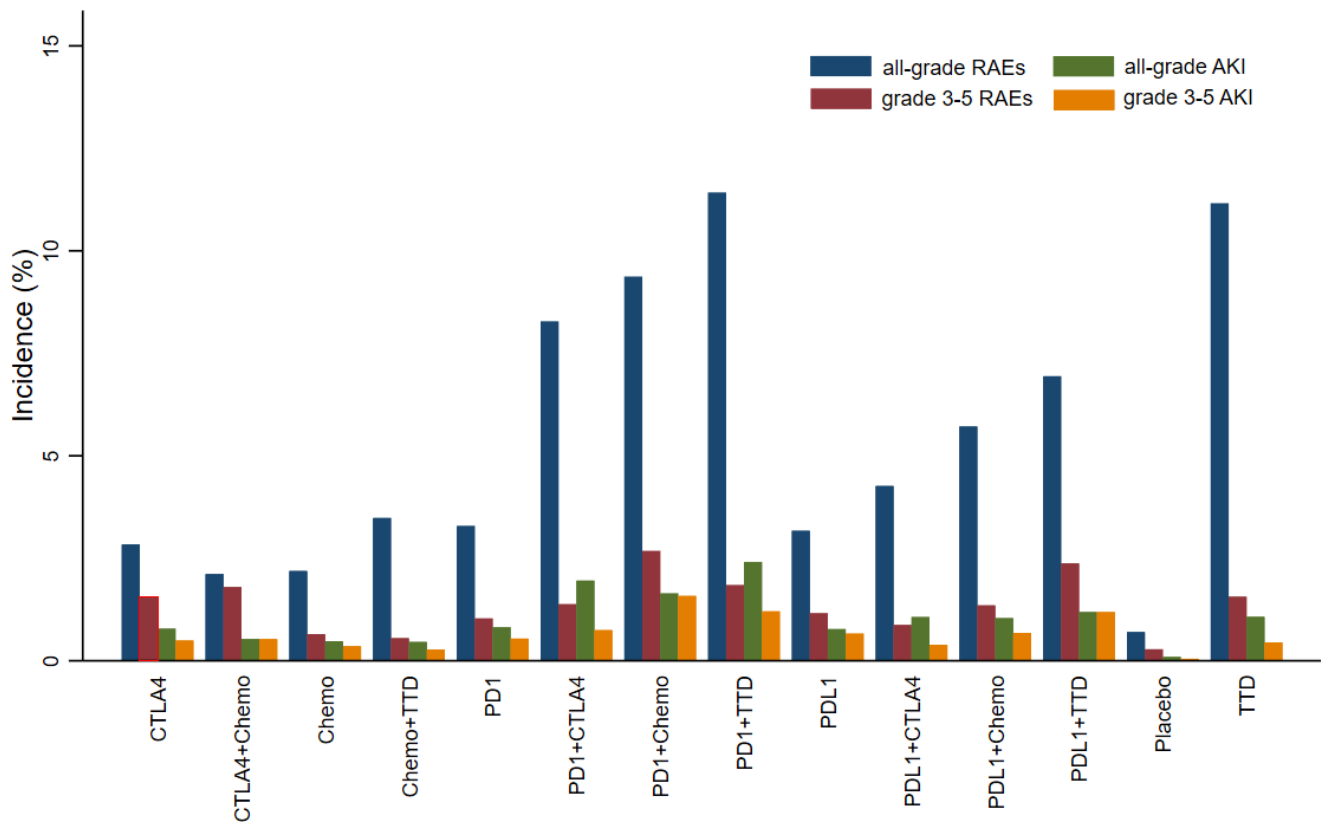



**Supplemental Figure 3.** Comparison-adjusted funnel plots of publication bias test for (A) RAEs, (B) grade 3-5 RAEs, (C) AKI, and (D) grade 3-5 AKI. RAEs, renal adverse events; AKI, acute kidney injury.

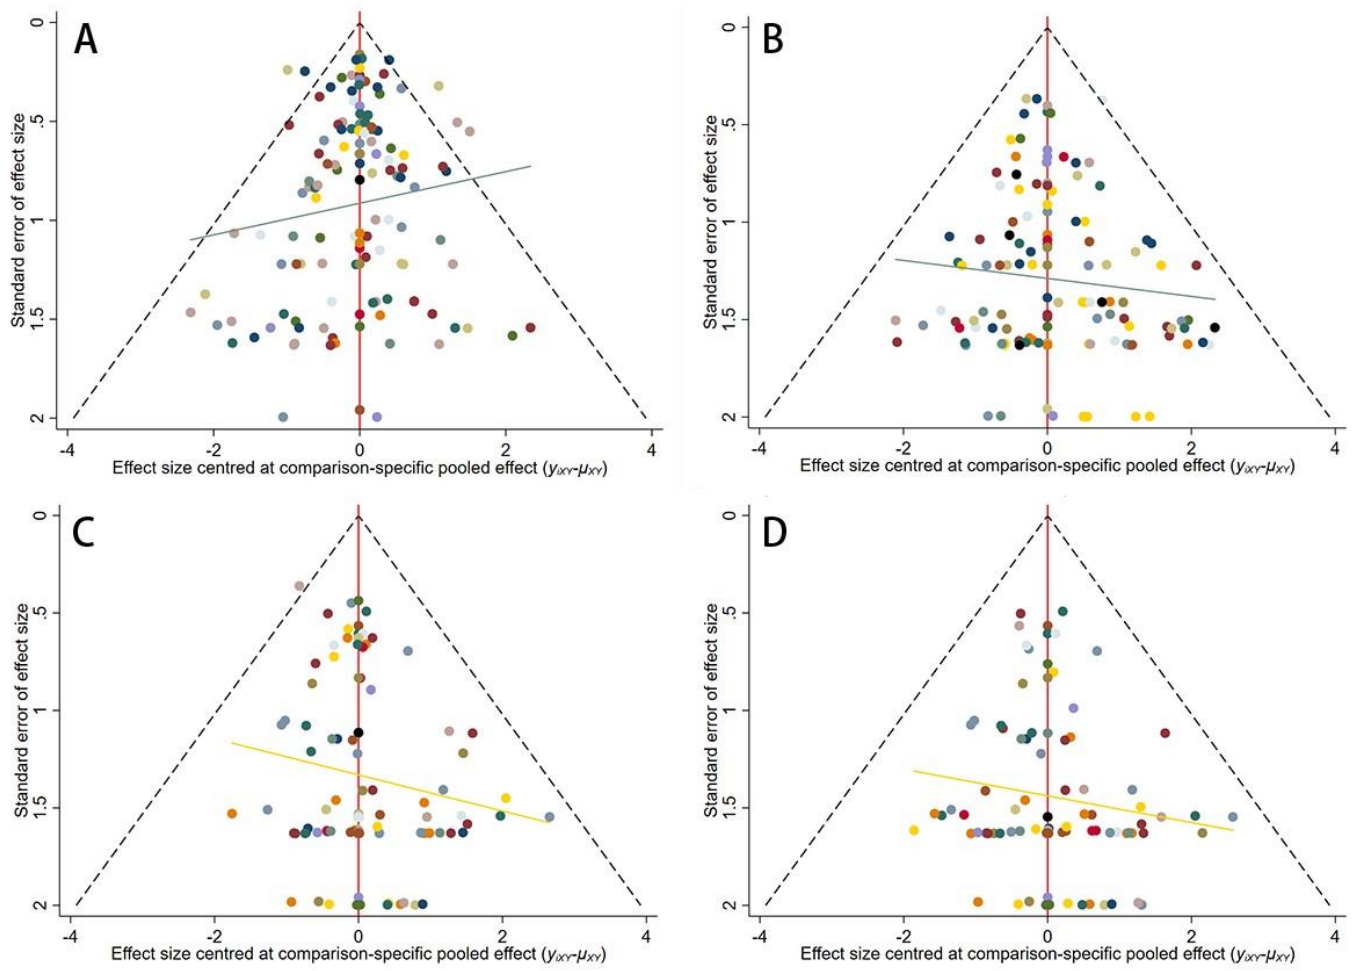

**Supplemental Figure 4.** Network plots for (A) grade 3-5 RAEs, (B) AKI, (C) grade 3-5 AKI, and RAEs in patients with (D) respiratory system cancer, (E) digestive system cancer, (F) urogenital system cancer (G) hematologic system cancer, and (H) skin cancer. Nodes indicate the classes which are evaluated in clinical trials. Lines represent head-to-head comparisons of the two treatment regimens indicated by the connected nodes. The thickness of lines is weighted according to the number of trials comparing the two connected treatment regimens. The size of the node is proportional to the number of trials evaluating the treatment. *RAEs*, renal adverse events; *AKI*, acute kidney injury; *TTD*, Targeted therapy drug; *Chemo*, Chemotherapy; *PD-1*, programmed cell death 1; *PD-L1*, programmed cell death ligand 1; *CTLA4*, cytotoxic T-lymphocyte antigen 4.

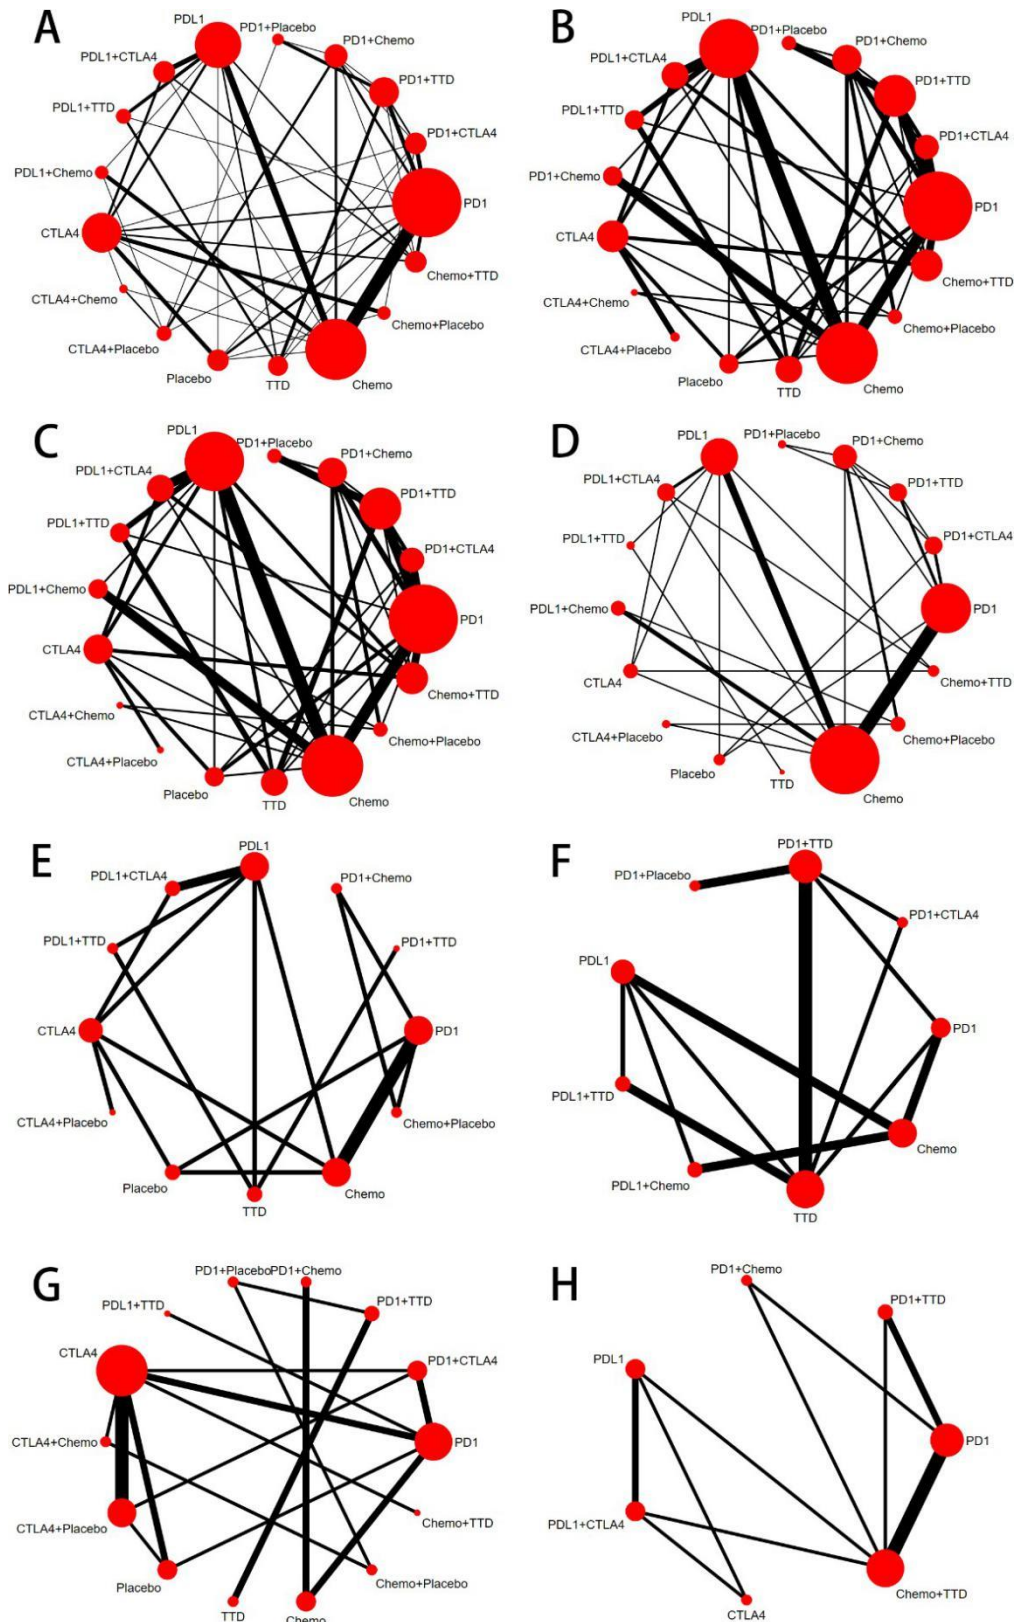

**Supplemental Figure 5.** Ranking probabilities curves for the risk of (A) RAEs, (B) grade 3-5 RAEs. The graphs display the distribution of probabilities of treatment ranking from best through worst for each outcome. The peak indicates the ranking with the highest probability for the corresponding treatment regimen. *RAEs*, renal adverse events; *PD-1*, programmed cell death 1; *PD-L1*, programmed cell death ligand 1; *CTLA4*, cytotoxic T-lymphocyte antigen 4.

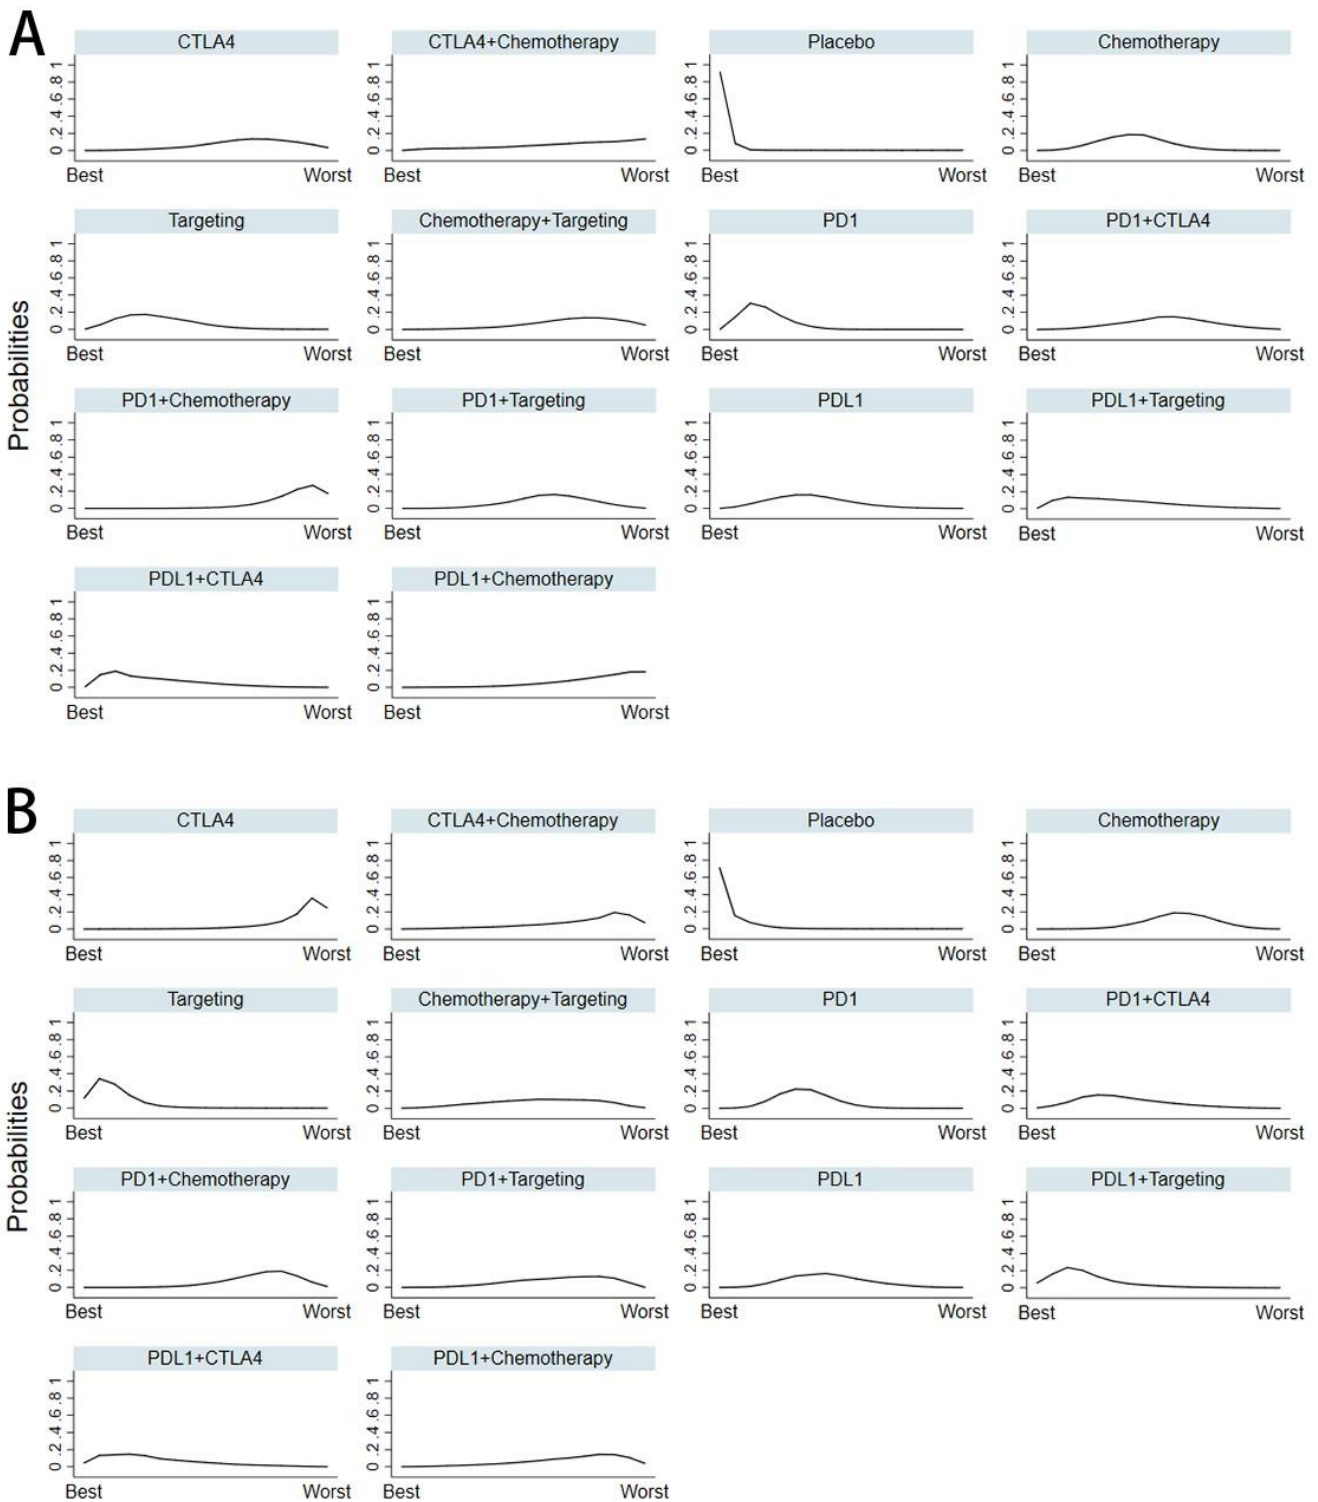

**Supplemental Figure 6.** Ranking probabilities curves for the risk of (A) AKI, (B) grade 3-5 AKI. The graphs display the distribution of probabilities of treatment ranking from best through worst for each outcome. The peak indicates the ranking with the highest probability for the corresponding treatment regimen. *AKI*, acute kidney injury; *PD-1*, programmed cell death 1; *PD-L1*, programmed cell death ligand 1; *CTLA4*, cytotoxic T-lymphocyte antigen 4.

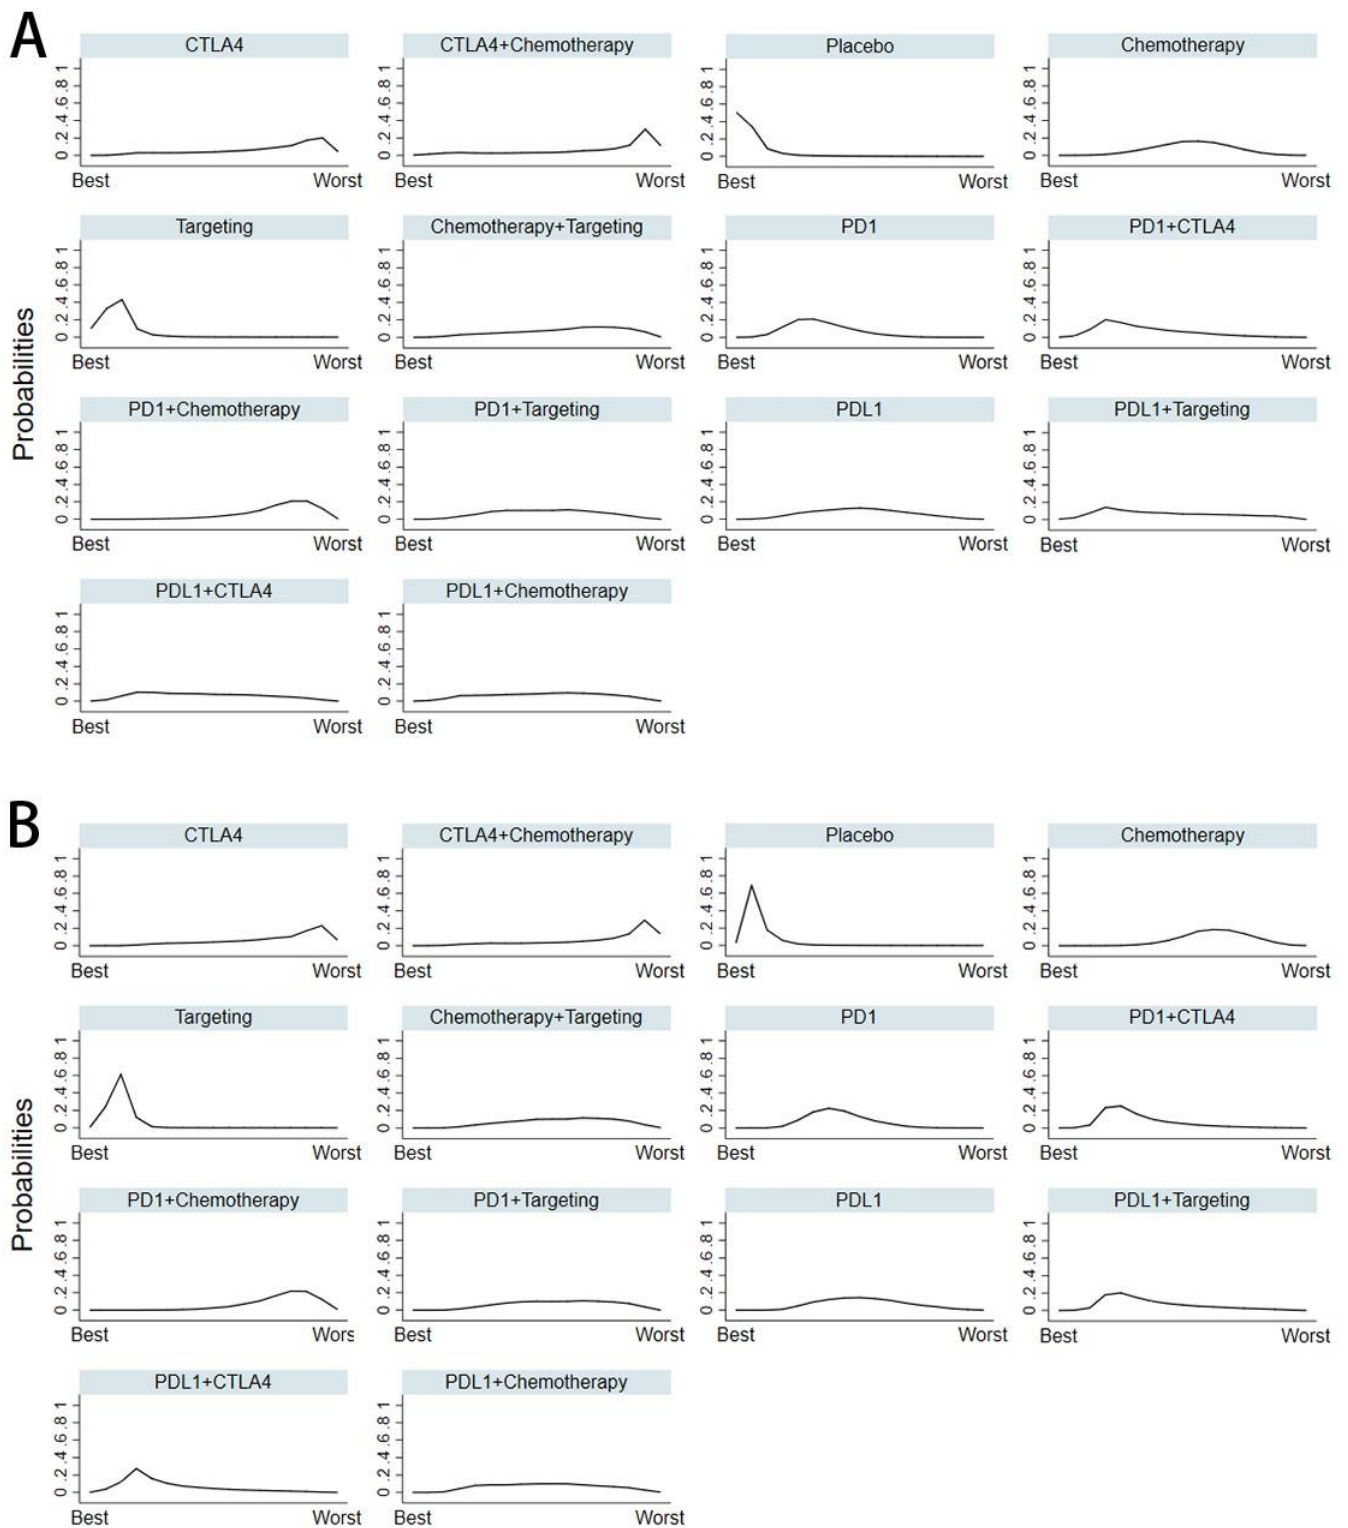

**Supplemental Figure 7.** Rankings of SUCRA for the risk of (A) grade 3-5 RAEs, (B) AKI, and (C) grade 3-5 AKI. *SUCRA*, surface under the cumulative ranking; *RAEs*, renal adverse events; *AKI*, acute kidney injury. *PD-1*, programmed cell death 1; *PD-L1*, programmed cell death ligand 1; *CTLA4*, cytotoxic T-lymphocyte antigen 4.

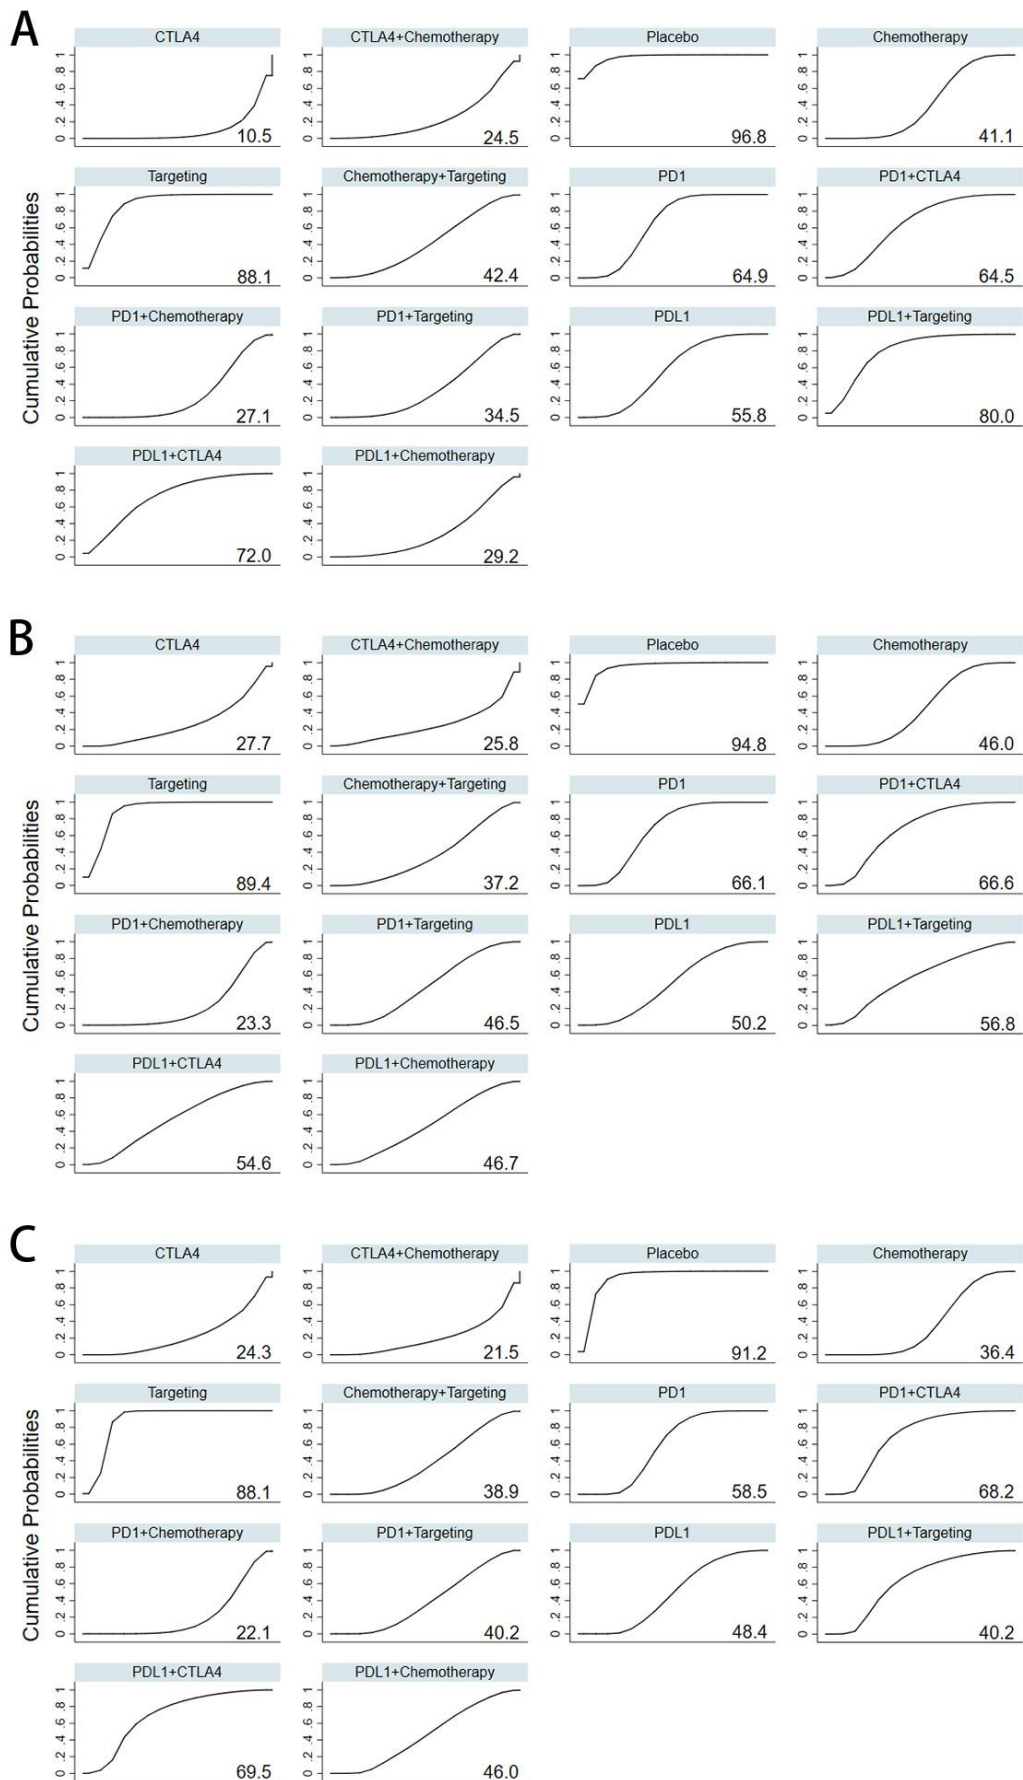



**Supplemental Figure 8.** Assessment of transitivity among all included trials. (A) Age, (B) Male, (C) Number of patients, and (D) Year. *TTD*, Targeted therapy drug; *Chemo*, Chemotherapy; *PD-1*, programmed cell death 1; *PD-L1*, programmed cell death ligand 1; *CTLA4*, cytotoxic T-lymphocyte antigen 4.

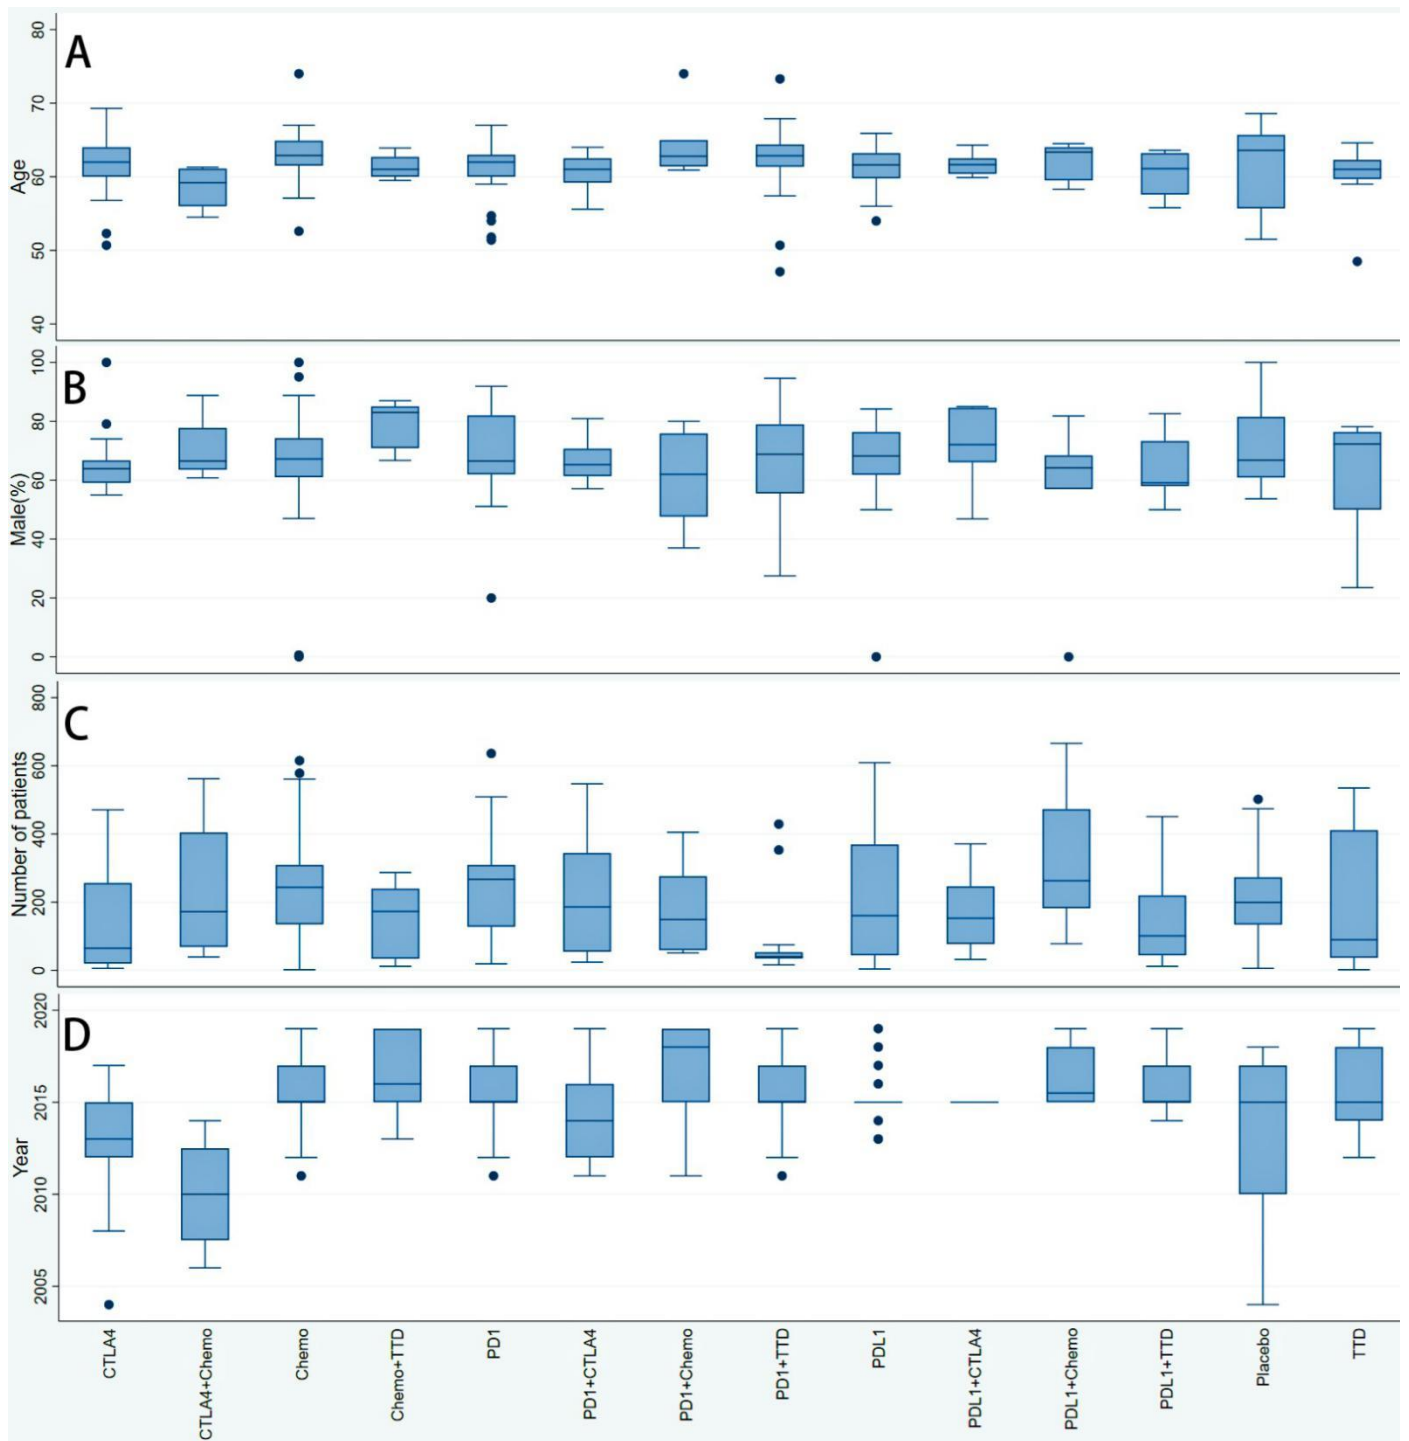

**Supplemental Figure 9.** Evaluation of local inconsistency for RAEs using Loop-specific method. Inconsistency refers to differences in effect estimates between direct and indirect comparisons, which could be evaluated when 3 treatments are connected within a loop. For each closed loop, we estimated the absolute difference between the direct and indirect comparisons, which is termed inconsistency factor (IF). Inconsistent loops were identified by a significant disagreement (IF and its 95% confidence interval that excludes 0) between direct and indirect evidence. *RAEs, renal adverse events.*

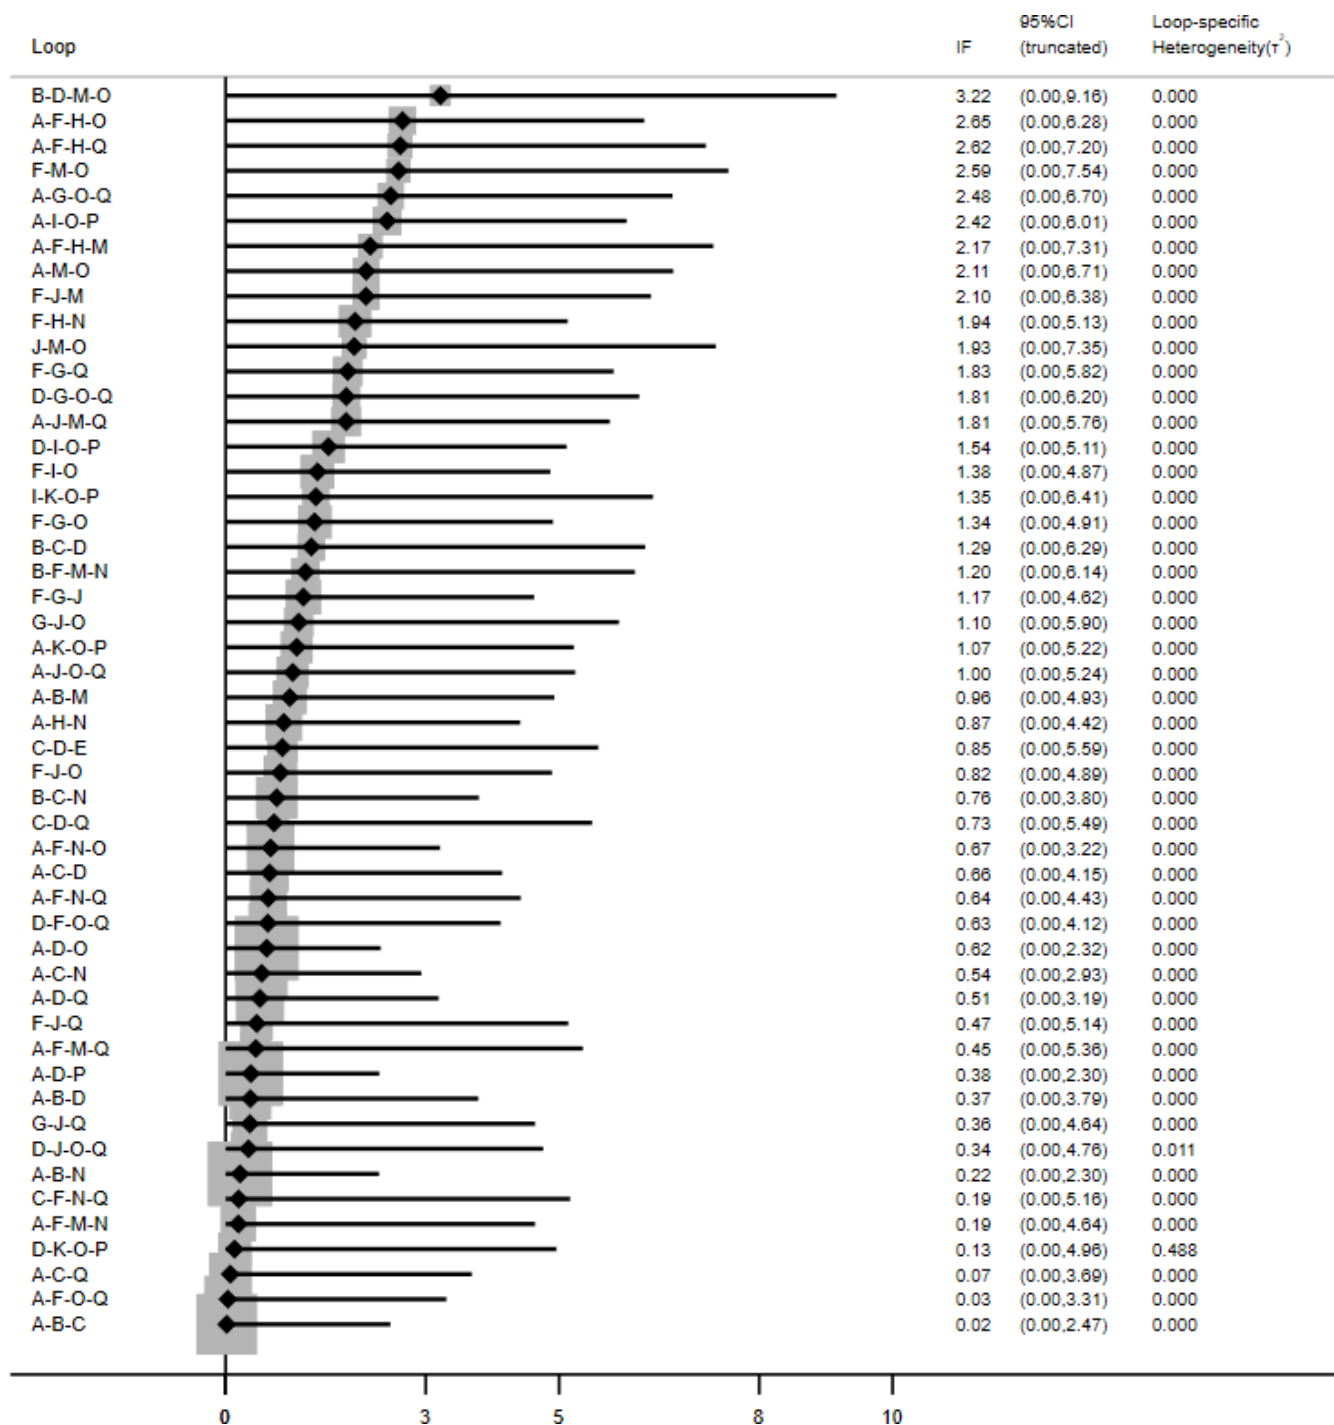

**Supplemental Figure 10.** The distribution of SUCRA values stratified by cancer types. *SUCRA*, surface under the cumulative ranking; *TTD*, Targeted therapy drug; *Chemo*, Chemotherapy; *PD-1*, programmed cell death 1; *PD-L1*, programmed cell death ligand 1; *CTLA4*, cytotoxic T-lymphocyte antigen 4.

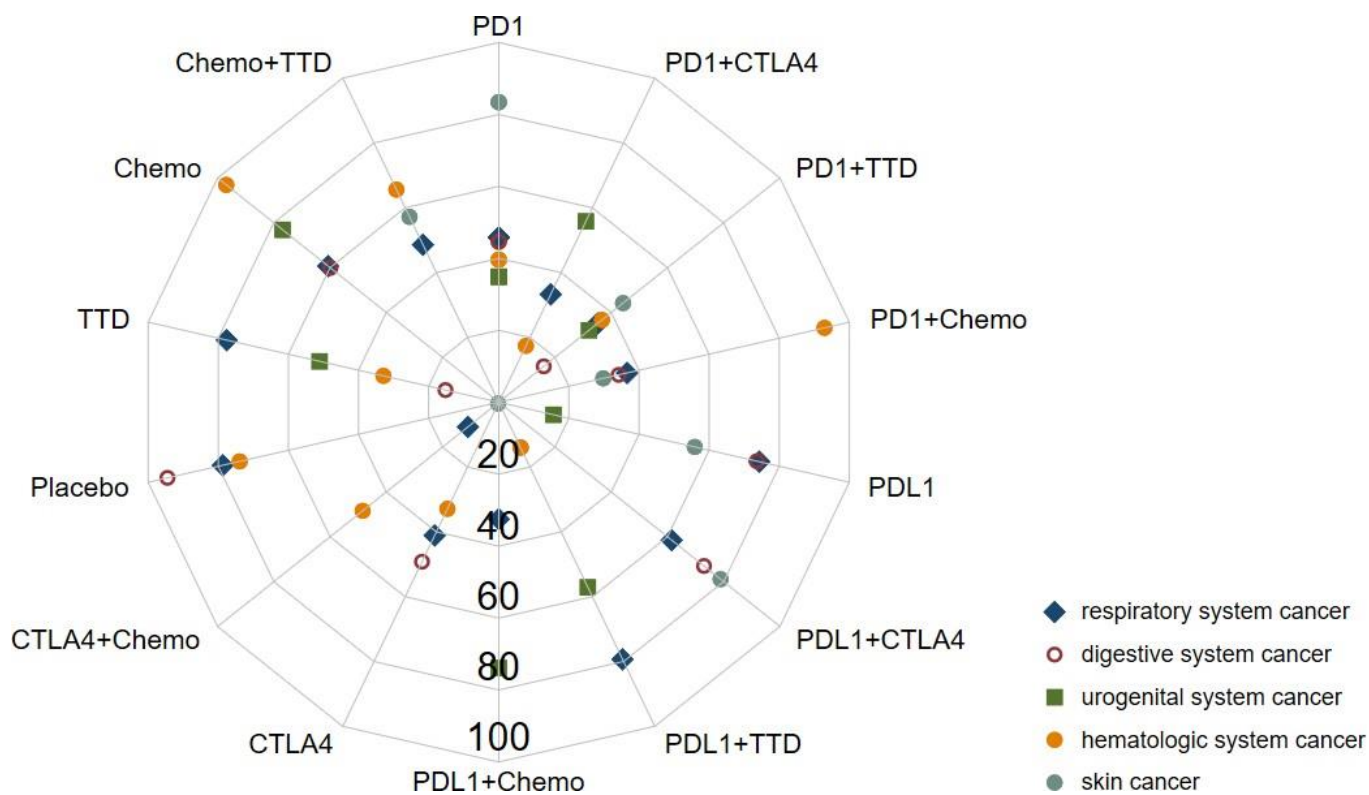

**Table S1. PRISMA NMA Checklist of Items to Include When Reporting A Systematic Review Involving a Network Meta-analysis**

| Section/Topic             | Item # | Checklist Item                                                                                                                                                                                                                                                                                                                                                                                                                                                                                                                                                                                                                                                                                                                                                                             | Reported on page |
|---------------------------|--------|--------------------------------------------------------------------------------------------------------------------------------------------------------------------------------------------------------------------------------------------------------------------------------------------------------------------------------------------------------------------------------------------------------------------------------------------------------------------------------------------------------------------------------------------------------------------------------------------------------------------------------------------------------------------------------------------------------------------------------------------------------------------------------------------|------------------|
| <b>TITLE</b>              |        |                                                                                                                                                                                                                                                                                                                                                                                                                                                                                                                                                                                                                                                                                                                                                                                            |                  |
| Title                     | 1      | Identify the report as a systematic review <i>incorporating a network meta-analysis (or related form of meta-analysis).</i>                                                                                                                                                                                                                                                                                                                                                                                                                                                                                                                                                                                                                                                                | <b>1</b>         |
| <b>ABSTRACT</b>           |        |                                                                                                                                                                                                                                                                                                                                                                                                                                                                                                                                                                                                                                                                                                                                                                                            |                  |
| Structured summary        | 2      | Provide a structured summary including, as applicable:<br><b>Background:</b> main objectives<br><br><b>Methods:</b> data sources; study eligibility criteria, participants, and interventions; study appraisal; and <i>synthesis methods, such as network meta-analysis.</i><br><b>Results:</b> number of studies and participants identified; summary estimates with corresponding confidence/credible intervals; <i>treatment rankings may also be discussed. Authors may choose to summarize pairwise comparisons against a chosen treatment included in their analyses for brevity.</i><br><b>Discussion/Conclusions:</b> limitations; conclusions and implications of findings.<br><b>Other:</b> primary source of funding; systematic review registration number with registry name. | <b>1</b>         |
| <b>INTRODUCTION</b>       |        |                                                                                                                                                                                                                                                                                                                                                                                                                                                                                                                                                                                                                                                                                                                                                                                            |                  |
| Rationale                 | 3      | Describe the rationale for the review in the context of what is already known, <i>including mention of why a network meta-analysis has been conducted.</i>                                                                                                                                                                                                                                                                                                                                                                                                                                                                                                                                                                                                                                 | <b>1-2</b>       |
| Objectives                | 4      | Provide an explicit statement of questions being addressed, with reference to participants, interventions, comparisons, outcomes, and study design (PICOS).                                                                                                                                                                                                                                                                                                                                                                                                                                                                                                                                                                                                                                | <b>2</b>         |
| <b>METHODS</b>            |        |                                                                                                                                                                                                                                                                                                                                                                                                                                                                                                                                                                                                                                                                                                                                                                                            |                  |
| Protocol and registration | 5      | Indicate whether a review protocol exists and if and where it can be accessed (e.g., Web address); and, if available, provide registration information, including registration number.                                                                                                                                                                                                                                                                                                                                                                                                                                                                                                                                                                                                     | <b>2</b>         |
| Eligibility criteria      | 6      | Specify study characteristics (e.g., PICOS, length of follow-up) and report characteristics (e.g., years considered, language, publication status) used as criteria for eligibility, giving rationale. <i>Clearly describe eligible treatments included in the treatment</i>                                                                                                                                                                                                                                                                                                                                                                                                                                                                                                               | <b>3</b>         |

|                                        |           |                                                                                                                                                                                                                                                                                                                                                                                                                        |             |
|----------------------------------------|-----------|------------------------------------------------------------------------------------------------------------------------------------------------------------------------------------------------------------------------------------------------------------------------------------------------------------------------------------------------------------------------------------------------------------------------|-------------|
|                                        |           | <i>network, and note whether any have been clustered or merged into the same node (with justification).</i>                                                                                                                                                                                                                                                                                                            |             |
| Information sources                    | 7         | Describe all information sources (e.g., databases with dates of coverage, contact with study authors to identify additional studies) in the search and date last searched.                                                                                                                                                                                                                                             | 3           |
| Search                                 | 8         | Present full electronic search strategy for at least one database, including any limits used, such that it could be repeated.                                                                                                                                                                                                                                                                                          | 3, Table S2 |
| Study selection                        | 9         | State the process for selecting studies (i.e., screening, eligibility, included in systematic review, and, if applicable, included in the meta-analysis).                                                                                                                                                                                                                                                              | 3           |
| Data collection process                | 10        | Describe method of data extraction from reports (e.g., piloted forms, independently, in duplicate) and any processes for obtaining and confirming data from investigators.                                                                                                                                                                                                                                             | 3           |
| Data items                             | 11        | List and define all variables for which data were sought (e.g., PICOS, funding sources) and any assumptions and simplifications made.                                                                                                                                                                                                                                                                                  | 3           |
| <b>Geometry of the network</b>         | <b>S1</b> | Describe methods used to explore the geometry of the treatment network under study and potential biases related to it. This should include how the evidence base has been graphically summarized for presentation, and what characteristics were compiled and used to describe the evidence base to readers.                                                                                                           | 3-4         |
| Risk of bias within individual studies | 12        | Describe methods used for assessing risk of bias of individual studies (including specification of whether this was done at the study or outcome level), and how this information is to be used in any data synthesis.                                                                                                                                                                                                 | 3-4         |
| Summary measures                       | 13        | State the principal summary measures (e.g., risk ratio, difference in means). <i>Also describe the use of additional summary measures assessed, such as treatment rankings and surface under the cumulative ranking curve (SUCRA) values, as well as modified approaches used to present summary findings from meta-analyses.</i>                                                                                      | 3-4         |
| Planned methods of analysis            | 14        | Describe the methods of handling data and combining results of studies for each network meta-analysis. This should include, but not be limited to: <ul style="list-style-type: none"> <li>• <i>Handling of multi-arm trials;</i></li> <li>• <i>Selection of variance structure;</i></li> <li>• <i>Selection of prior distributions in Bayesian analyses; and</i></li> <li>• <i>Assessment of model fit.</i></li> </ul> | 3-4         |
| <b>Assessment of Inconsistency</b>     | <b>S2</b> | Describe the statistical methods used to evaluate the agreement of direct and indirect evidence in the treatment network(s) studied. Describe efforts taken to address its presence when found.                                                                                                                                                                                                                        | 3-4         |

|                                          |    |                                                                                                                                                                                                                                                                                                                                                                                                                                                              |                                                 |
|------------------------------------------|----|--------------------------------------------------------------------------------------------------------------------------------------------------------------------------------------------------------------------------------------------------------------------------------------------------------------------------------------------------------------------------------------------------------------------------------------------------------------|-------------------------------------------------|
| Risk of bias across studies              | 15 | Specify any assessment of risk of bias that may affect the cumulative evidence (e.g., publication bias, selective reporting within studies).                                                                                                                                                                                                                                                                                                                 | 3-4                                             |
| Additional analyses                      | 16 | Describe methods of additional analyses if done, indicating which were pre-specified. This may include, but not be limited to, the following: <ul style="list-style-type: none"> <li>• Sensitivity or subgroup analyses;</li> <li>• Meta-regression analyses;</li> <li>• <i>Alternative formulations of the treatment network; and</i></li> <li>• <i>Use of alternative prior distributions for Bayesian analyses (if applicable).</i></li> </ul>            | 3-4                                             |
| <b>RESULTS†</b>                          |    |                                                                                                                                                                                                                                                                                                                                                                                                                                                              |                                                 |
| Study selection                          | 17 | Give numbers of studies screened, assessed for eligibility, and included in the review, with reasons for exclusions at each stage, ideally with a flow diagram.                                                                                                                                                                                                                                                                                              | 4, Figure 1                                     |
| <b>Presentation of network structure</b> | S3 | Provide a network graph of the included studies to enable visualization of the geometry of the treatment network.                                                                                                                                                                                                                                                                                                                                            | <b>Figure 2, Supplemental Figure 4</b>          |
| <b>Summary of network geometry</b>       | S4 | Provide a brief overview of characteristics of the treatment network. This may include commentary on the abundance of trials and randomized patients for the different interventions and pairwise comparisons in the network, gaps of evidence in the treatment network, and potential biases reflected by the network structure.                                                                                                                            | 4                                               |
| Study characteristics                    | 18 | For each study, present characteristics for which data were extracted (e.g., study size, PICOS, follow-up period) and provide the citations.                                                                                                                                                                                                                                                                                                                 | 4, Table S4                                     |
| Risk of bias within studies              | 19 | Present data on risk of bias of each study and, if available, any outcome level assessment.                                                                                                                                                                                                                                                                                                                                                                  | 4, Supplemental Figure 2, Supplemental Figure 3 |
| Results of individual studies            | 20 | For all outcomes considered (benefits or harms), present, for each study: 1) simple summary data for each intervention group, and 2) effect estimates and confidence intervals. <i>Modified approaches may be needed to deal with information from larger networks.</i>                                                                                                                                                                                      | 4-5                                             |
| Synthesis of results                     | 21 | Present results of each meta-analysis done, including confidence/credible intervals. <i>In larger networks, authors may focus on comparisons versus a particular comparator (e.g. placebo or standard care), with full findings presented in an appendix. League tables and forest plots may be considered to summarize pairwise comparisons. If additional summary measures were explored (such as treatment rankings), these should also be presented.</i> | 4-6, Table 1, Table S5, Table S6                |

|                                      |    |                                                                                                                                                                                                                                                                                                                                                                                                                                |                                           |
|--------------------------------------|----|--------------------------------------------------------------------------------------------------------------------------------------------------------------------------------------------------------------------------------------------------------------------------------------------------------------------------------------------------------------------------------------------------------------------------------|-------------------------------------------|
| <b>Exploration for inconsistency</b> | S5 | Describe results from investigations of inconsistency. This may include such information as measures of model fit to compare consistency and inconsistency models, <i>P</i> values from statistical tests, or summary of inconsistency estimates from different parts of the treatment network.                                                                                                                                | <b>6, Supplemental Figure 9, Table S8</b> |
| Risk of bias across studies          | 22 | Present results of any assessment of risk of bias across studies for the evidence base being studied.                                                                                                                                                                                                                                                                                                                          | <b>6, Supplemental Figure 8</b>           |
| Results of additional analyses       | 23 | Give results of additional analyses, if done (e.g., sensitivity or subgroup analyses, meta-regression analyses, <i>alternative network geometries studied</i> , <i>alternative choice of prior distributions for Bayesian analyses</i> , and so forth).                                                                                                                                                                        | <b>6, Table S9, Table S10, Table S11</b>  |
| <b>DISCUSSION</b>                    |    |                                                                                                                                                                                                                                                                                                                                                                                                                                |                                           |
| Summary of evidence                  | 24 | Summarize the main findings, including the strength of evidence for each main outcome; consider their relevance to key groups (e.g., healthcare providers, users, and policy-makers).                                                                                                                                                                                                                                          | <b>6-8</b>                                |
| Limitations                          | 25 | Discuss limitations at study and outcome level (e.g., risk of bias), and at review level (e.g., incomplete retrieval of identified research, reporting bias). <i>Comment on the validity of the assumptions, such as transitivity and consistency. Comment on any concerns regarding network geometry (e.g., avoidance of certain comparisons).</i>                                                                            | <b>8</b>                                  |
| Conclusions                          | 26 | Provide a general interpretation of the results in the context of other evidence, and implications for future research.                                                                                                                                                                                                                                                                                                        | <b>8</b>                                  |
| <b>FUNDING</b>                       |    |                                                                                                                                                                                                                                                                                                                                                                                                                                |                                           |
| Funding                              | 27 | Describe sources of funding for the systematic review and other support (e.g., supply of data); role of funders for the systematic review. This should also include information regarding whether funding has been received from manufacturers of treatments in the network and/or whether some of the authors are content experts with professional conflicts of interest that could affect use of treatments in the network. | <b>8</b>                                  |

**Table S2. Search strategy**

## A: Search strategy in PubMed

| #  | Query                                                                                                                                                                                                                                                                                                                                                           |
|----|-----------------------------------------------------------------------------------------------------------------------------------------------------------------------------------------------------------------------------------------------------------------------------------------------------------------------------------------------------------------|
| 1# | Programmed death ligand 1[tiab] OR PD-L1[tiab] OR Programmed death 1[tiab] OR PD-1[tiab] OR Cytotoxic T-lymphocyte antigen 4[tiab] OR CTLA-4[tiab] OR Nivolumab[tiab] OR Pembrolizumab[tiab] OR Cemiplimab[tiab] OR Toripalimab[tiab] OR Sintilimab[tiab] OR Atezolizumab[tiab] OR Avelumab[tiab] OR Durvalumab[tiab] OR Ipilimumab[tiab] OR Tremelimumab[tiab] |
| 2# | randomized controlled trial[tiab] OR randomized[tiab] OR random[tiab] OR placebo[tiab] OR double blind[tiab]                                                                                                                                                                                                                                                    |
| 3# | Humans[mh]                                                                                                                                                                                                                                                                                                                                                      |
| 4# | 1# and 2# and 3#                                                                                                                                                                                                                                                                                                                                                |
| 5# | 2000/01/01[PDAT] : 2020/06/10[PDAT]                                                                                                                                                                                                                                                                                                                             |
| 6# | 4# and 5#                                                                                                                                                                                                                                                                                                                                                       |

## B: Search strategy in Embase

| #  | Query                                                                                                                                                                                                                                                                                                                                                                                           |
|----|-------------------------------------------------------------------------------------------------------------------------------------------------------------------------------------------------------------------------------------------------------------------------------------------------------------------------------------------------------------------------------------------------|
| 1# | 'programmed death ligand 1':ab,ti OR 'PD-L1':ab,ti OR 'programmed death 1':ab,ti OR 'PD-1':ab,ti OR 'Cytotoxic T-lymphocyte antigen 4':ab,ti OR 'CTLA-4':ab,ti OR 'Nivolumab':ab,ti OR 'Pembrolizumab':ab,ti OR 'Cemiplimab':ab,ti OR 'Toripalimab':ab,ti OR 'Sintilimab':ab,ti OR 'Atezolizumab':ab,ti OR 'Avelumab':ab,ti OR 'Durvalumab':ab,ti OR 'Ipilimumab':ab,ti OR 'Tremelimumab':ab,ti |
| 2# | 'randomized controlled trial':ab,ti OR 'randomized':ab,ti OR 'random':ab,ti OR 'placebo':ab,ti OR 'double blind':ab,ti                                                                                                                                                                                                                                                                          |
| 3# | 2# and 3# AND [humans]/lim AND [1-1-2000]/sd NOT [1-6-2020]/sd                                                                                                                                                                                                                                                                                                                                  |

## C: Search strategy in Cochrane Library

| #  | Query                                                                                                                                                                                                                                                                                                                                                                                                                            |
|----|----------------------------------------------------------------------------------------------------------------------------------------------------------------------------------------------------------------------------------------------------------------------------------------------------------------------------------------------------------------------------------------------------------------------------------|
| 1# | (programmed death ligand 1):ti,ab,kw OR(PD-L1):ti,ab,kw OR(programmed death 1):ti,ab,kw OR(PD-1):ti,ab,kw OR(Cytotoxic T-lymphocyte antigen 4):ti,ab,kw OR(CTLA-4):ti,ab,kw OR(Nivolumab):ti,ab,kw OR(Pembrolizumab):ti,ab,kw OR(Cemiplimab):ti,ab,kw OR(Toripalimab):ti,ab,kw OR(Sintilimab):ti,ab,kw OR(Atezolizumab):ti,ab,kw OR(Avelumab):ti,ab,kw OR(Durvalumab):ti,ab,kw OR(Ipilimumab):ti,ab,kw OR(Tremelimumab):ti,ab,kw |
| 2# | (randomized controlled trial):ti,ab,kw OR(randomized):ti,ab,kw OR(random):ti,ab,kw OR(placebo):ti,ab,kw OR(double blind):ti,ab,kw                                                                                                                                                                                                                                                                                                |
| 3# | 2# and 3#                                                                                                                                                                                                                                                                                                                                                                                                                        |
| 4# | Publication Date: Jan 2000 to Jun 2020                                                                                                                                                                                                                                                                                                                                                                                           |



**Table S3. FDA-approved doses of immune checkpoint inhibitors**

|                  |               |                                                                                                                                                                                                                                                                                                                                                                                                                                                                                                                                                                            |
|------------------|---------------|----------------------------------------------------------------------------------------------------------------------------------------------------------------------------------------------------------------------------------------------------------------------------------------------------------------------------------------------------------------------------------------------------------------------------------------------------------------------------------------------------------------------------------------------------------------------------|
| CTLA-4 inhibitor | Ipilimumab    | Administer 3 mg/kg as an intravenous infusion over 90 minutes every 3 weeks for a total of four doses.                                                                                                                                                                                                                                                                                                                                                                                                                                                                     |
| PD-1 inhibitor   | Nivolumab     | Administer as an intravenous infusion over 30 minutes.<br><ul style="list-style-type: none"> <li>● 3 mg/kg every 2 weeks, 240 mg every 2 weeks or 480 mg every 4 weeks.</li> <li>● Nivolumab with ipilimumab: Nivolumab 1 mg/kg, followed by ipilimumab on the same day, every 3 weeks for 4 doses, then Nivolumab 240 mg every 2 weeks or 480 mg every 4 weeks.</li> <li>● Nivolumab with ipilimumab: Nivolumab 3 mg/kg followed by ipilimumab 1 mg/kg on the same day every 3 weeks for 4 doses, then Nivolumab 240 mg every 2 weeks or 480 mg every 4 weeks.</li> </ul> |
|                  | Pembrolizumab | Administer as an intravenous infusion over 30 minutes.<br><ul style="list-style-type: none"> <li>● 2 mg/kg every 3 weeks, 200 mg every 3 weeks or 400 mg every 6 weeks.</li> </ul>                                                                                                                                                                                                                                                                                                                                                                                         |
| PD-L1 inhibitor  | Avelumab      | Administer as an intravenous infusion over 60 minutes.<br><ul style="list-style-type: none"> <li>● 10 mg/kg every 2 weeks or 800 mg every 2 weeks.</li> </ul>                                                                                                                                                                                                                                                                                                                                                                                                              |
|                  | Atezolizumab  | Administer as an intravenous infusion over 60 minutes. If the first infusion is tolerated, all subsequent infusions may be delivered over 30 minutes.<br><ul style="list-style-type: none"> <li>● 840 mg every 2 weeks, 1200 mg every 3 weeks, or 1680 mg every 4 weeks.</li> </ul>                                                                                                                                                                                                                                                                                        |
|                  | Durvalumab    | Administer 10 mg/kg as an intravenous infusion over 60 minutes every 2 weeks.                                                                                                                                                                                                                                                                                                                                                                                                                                                                                              |

**Table S4. Main characteristics of the trials included in this meta-analysis**

| Trial       | Year | Multi center | Phase | Tumor type | Drug          | Median age | Male(%) | Sample size | Number of patients | RAAEs     |           | Acute kidney injury |           | CTCAE version |
|-------------|------|--------------|-------|------------|---------------|------------|---------|-------------|--------------------|-----------|-----------|---------------------|-----------|---------------|
|             |      |              |       |            |               |            |         |             |                    | All grade | Grade 3-5 | All grade           | Grade 3-5 |               |
| NCT02538666 | 2015 | Y            | 3     | SCLC       | Placebo       | 63.2       | 63.6    | 830         | 273                | 7         | 1         | 0                   | 0         | 4             |
|             |      |              |       |            | Niv           | 64.6       | 63.2    |             | 279                | 12        | 1         | 0                   | 0         |               |
|             |      |              |       |            | Niv+Ipi       | 63.9       | 64.5    |             | 278                | 23        | 5         | 2                   | 2         |               |
| NCT01668784 | 2012 | Y            | 3     | RCC        | Niv           | 60.6       | 76.8    | 803         | 406                | 73        | 18        | 8                   | 8         | 4             |
|             |      |              |       |            | TTD           | 61.9       | 74      |             | 397                | 58        | 9         | 5                   | 5         |               |
| Wolchok     | 2017 | Y            | 3     | Melanoma   | Niv           | 60         | 64      | 937         | 313                | 2         | 1         | -                   | -         | 4             |
|             |      |              |       |            | Niv+Ipi       | 61         | 66      |             | 313                | 14        | 1         | -                   | -         |               |
|             |      |              |       |            | Ipi           | 62         | 64      |             | 311                | 5         | 0         | -                   | -         |               |
| NCT01621490 | 2012 | Y            | 1     | Melanoma   | Niv           | 54.7       | 56.6    | 168         | 106                | 5         | 2         | 1                   | 1         | 4             |
|             |      |              |       |            | Niv+Ipi       | 57.9       | 64.5    |             | 62                 | 8         | 1         | 4                   | 1         |               |
| Wu          | 2019 | Y            | 3     | NSCLC      | Niv           | 60         | 78      | 493         | 337                | 16        | 0         | 1                   | 0         | 4             |
|             |      |              |       |            | Chemo         | 60         | 81      |             | 156                | 5         | 0         | 0                   | 0         |               |
| Borghaei    | 2015 | Y            | 3     | NSCLC      | Niv           | 61         | 52      | 555         | 287                | 7         | 0         | -                   | -         | 4             |
|             |      |              |       |            | Chemo         | 64         | 58      |             | 268                | 1         | 0         | -                   | -         |               |
| NCT02481830 | 2015 | Y            | 3     | SCLC       | Niv           | 61.5       | 61.3    | 547         | 282                | 1         | 1         | -                   | -         | 4             |
|             |      |              |       |            | Chemo         | 61.6       | 62.1    |             | 265                | 1         | 1         | -                   | -         |               |
| Ferris      | 2016 | Y            | 3     | HNSCC      | Niv           | 59         | 82.1    | 347         | 236                | 1         | 0         | 1                   | 0         | 4             |
|             |      |              |       |            | Chemo         | 61         | 85.1    |             | 111                | 2         | 1         | 2                   | 1         |               |
| Brahmer     | 2015 | Y            | 3     | NSCLC      | Niv           | 62         | 82      | 260         | 131                | 5         | 1         | -                   | -         | 4             |
|             |      |              |       |            | Chemo         | 64         | 71      |             | 129                | 3         | 0         | -                   | -         |               |
| Carbone     | 2017 | Y            | 3     | NSCLC      | Niv           | 63         | 68      | 530         | 267                | 5         | 1         | -                   | -         | 4             |
|             |      |              |       |            | Chemo         | 65         | 55      |             | 263                | 16        | 0         | -                   | -         |               |
| Robert      | 2015 | Y            | 3     | Melanoma   | Niv+Placebo   | 64         | 57.6    | 411         | 206                | 4         | 1         | -                   | -         | 4             |
|             |      |              |       |            | Chemo+Placebo | 66         | 60.1    |             | 205                | 1         | 0         | -                   | -         |               |
| Weber       | 2015 | Y            | 3     | Melanoma   | Niv           | 59         | 65      | 370         | 268                | 2         | 0         | -                   | -         | 4             |
|             |      |              |       |            | Chemo         | 62         | 64      |             | 102                | 0         | 0         | -                   | -         |               |
| NCT03361865 | 2017 | Y            | 3     | UC         | Pem+TTD       | 73.3       | 75      | 92          | 43                 | 5         | 2         | 0                   | 0         | 4             |
|             |      |              |       |            | Pem+Placebo   | 72.4       | 77.6    |             | 49                 | 7         | 4         | 2                   | 2         |               |
| NCT03374488 | 2017 | Y            | 3     | UC         | Pem+TTD       | 67.9       | 83.3    | 83          | 42                 | 3         | 0         | 0                   | 0         | 4             |

|             |      |   |     |              |               |      |      |      |     |    |    |    |   |      |
|-------------|------|---|-----|--------------|---------------|------|------|------|-----|----|----|----|---|------|
|             |      |   |     |              | Pem+Placebo   | 65.2 | 88.1 |      | 41  | 2  | 2  | 1  | 1 |      |
| NCT03322540 | 2017 | Y | 2   | NSCLC        | Pem+TTD       | 63.7 | 68.8 | 152  | 75  | 3  | 0  | 0  | 0 | 4    |
|             |      |   |     |              | Pem+ placebo  | 66.9 | 76.6 |      | 77  | 7  | 1  | 1  | 1 |      |
| Eggermont   | 2018 | Y | 3   | Melanoma     | Pem           | 54   | 63   | 1011 | 509 | 2  | 2  | -  | - | 4    |
|             |      |   |     |              | Placebo       | 54   | 60.2 |      | 502 | 1  | 0  | -  | - |      |
| NCT02337491 | 2015 | Y | 2   | Glioblastoma | Pem+TTD       | 50.7 | 70   | 80   | 50  | 4  | -  | -  | - | 4    |
|             |      |   |     |              | Pem           | 51.8 | 63.3 |      | 30  | 0  | -  | -  | - |      |
| Long        | 2019 | Y | 3   | Melanoma     | Pem+TTD       | 64   | 61   | 705  | 353 | 5  | 2  | 1  | 1 | 4.03 |
|             |      |   |     |              | Pem+Placebo   | 63   | 59   |      | 352 | 5  | 1  | 3  | 1 |      |
| Robert      | 2015 | Y | 3   | Melanoma     | Ipi           | 62   | 58.3 | 533  | 256 | 2  | 1  | -  | - | 4    |
|             |      |   |     |              | Pem           | 63   | 62.8 |      | 277 | 4  | 0  | -  | - |      |
| NCT03358472 | 2017 | Y | 3   | HNSCC        | Pem+TTD       | 62.1 | 85.7 | 87   | 34  | 4  | 1  | 1  | 1 | 4    |
|             |      |   |     |              | Pem           | 63   | 84.2 |      | 19  | 1  | 0  | 0  | 0 |      |
|             |      |   |     |              | Chemo         | 62.7 | 82.9 |      | 34  | 4  | 1  | 0  | 0 |      |
| NCT02702401 | 2016 | Y | 3   | HCC          | Pem           | 65.6 | 81.3 | 413  | 279 | 5  | 5  | 3  | 3 | 4    |
|             |      |   |     |              | Placebo       | 64.4 | 83   |      | 134 | 0  | 0  | 0  | 0 |      |
| Herbst      | 2016 | Y | 2/3 | NSCLC        | Pem           | 63   | 62   | 648  | 339 | 6  | 0  | -  | - | 4    |
|             |      |   |     |              | Chemo         | 62   | 61   |      | 309 | 0  | 0  | -  | - |      |
| NCT02546986 | 2015 | Y | 2   | NSCLC        | Pem+Chemo     | 62.8 | 51   | 100  | 51  | 0  | 0  | 0  | 0 | 4    |
|             |      |   |     |              | Pem+Placebo   | 64.9 | 63.3 |      | 49  | 2  | 2  | 1  | 1 |      |
| NCT02351739 | 2015 | Y | 2   | UC           | Pem           | 65.8 | 20   | 75   | 35  | 9  | 2  | 4  | 2 | 4.03 |
|             |      |   |     |              | Pem+TTD       | 66.4 | 27.5 |      | 40  | 12 | 5  | 7  | 5 |      |
| Bellmunt    | 2017 | Y | 3   | UC           | Pem           | 67   | 74.1 | 521  | 266 | 30 | 11 | 15 | 7 | 4    |
|             |      |   |     |              | Chemo         | 65   | 74.3 |      | 255 | 22 | 4  | 7  | 3 |      |
| NCT02448303 | 2015 | N | 2   | NSCLC        | Pem           | 63.7 | 54.5 | 68   | 33  | 5  | 1  | 3  | 1 | 4.03 |
|             |      |   |     |              | Pem+TTD       | 64.6 | 42.9 |      | 35  | 8  | 0  | 4  | 0 |      |
| Burtness    | 2019 | Y | 3   | HNSCC        | Pem           | 62   | 83   | 863  | 300 | 9  | 6  | 4  | 4 | 4    |
|             |      |   |     |              | Pem+Chemo     | 61   | 80   |      | 276 | 38 | 6  | 5  | 5 |      |
|             |      |   |     |              | Chemo+TTD     | 61   | 87   |      | 287 | 19 | 2  | 2  | 2 |      |
| NCT02494583 | 2015 | Y | 3   | GEC          | Pem           | 59.9 | 70.3 | 748  | 254 | 16 | 8  | 4  | 4 | 4    |
|             |      |   |     |              | Pem+Chemo     | 60.9 | 75.9 |      | 250 | 43 | 13 | 8  | 8 |      |
|             |      |   |     |              | Chemo+Placebo | 60.7 | 71.6 |      | 244 | 48 | 14 | 8  | 8 |      |

|             |      |   |      |          |           |      |      |      |     |    |    |    |    |      |
|-------------|------|---|------|----------|-----------|------|------|------|-----|----|----|----|----|------|
| NCT02454179 | 2015 | N | 2    | HNSCC    | Pem       | 62.1 | 87.2 | 76   | 39  | 2  | 0  | 0  | 0  | 4.03 |
|             |      |   |      |          | Pem+TTD   | 61.4 | 94.6 |      | 37  | 12 | 3  | 6  | 3  |      |
| Mok         | 2019 | Y | 3    | NSCLC    | Pem       | 63   | 71   | 1251 | 636 | 3  | 1  | -  | -  | 4    |
|             |      |   |      |          | Chemo     | 63   | 71   |      | 615 | 0  | 0  | -  | -  |      |
| Cohen       | 2019 | Y | 3    | HNSCC    | Pem       | 60   | 84   | 480  | 246 | 1  | 1  | 1  | 1  | 4    |
|             |      |   |      |          | Chemo     | 60   | 83   |      | 234 | 3  | 0  | 1  | 0  |      |
| NCT03933449 | 2016 | Y | 3    | GEC      | Pem       | 60.1 | 91.9 | 121  | 62  | 1  | 1  | 1  | 1  | 4    |
|             |      |   |      |          | Chemo     | 59.6 | 95.1 |      | 59  | 0  | 0  | 0  | 0  |      |
| NCT03850444 | 2016 | Y | 3    | NSCLC    | Pem       | 60.9 | 82   | 253  | 128 | 2  | 2  | -  | -  | 4    |
|             |      |   |      |          | Chemo     | 61.5 | 88.8 |      | 125 | 1  | 1  | -  | -  |      |
| NCT02564263 | 2015 | Y | 3    | GEC      | Pem       | 62.6 | 86.9 | 610  | 314 | 2  | 2  | 2  | 2  | 4    |
|             |      |   |      |          | Chemo     | 62   | 86.3 |      | 296 | 2  | 2  | 1  | 1  |      |
| Ribas       | 2015 | Y | 2    | Melanoma | Pem       | 62   | 58   | 349  | 178 | 1  | 0  | -  | -  | 4    |
|             |      |   |      |          | Chemo     | 63   | 64   |      | 171 | 0  | 0  | -  | -  |      |
| NCT02370498 | 2015 | Y | 3    | GEC      | Pem       | 60.7 | 68.2 | 570  | 294 | 5  | 5  | 3  | 3  | 4    |
|             |      |   |      |          | Chemo     | 59.6 | 70.3 |      | 276 | 2  | 2  | 0  | 0  |      |
| Reck        | 2016 | Y | 3    | NSCLC    | Pem       | 64.5 | 59.7 | 304  | 154 | 4  | 1  | -  | -  | 3    |
|             |      |   |      |          | Chemo     | 66   | 62.9 |      | 150 | 15 | 1  | -  | -  |      |
| NCT01454102 | 2011 | Y | 1    | NSCLC    | Niv+Chemo | 61.4 | 47.6 | 203  | 56  | 10 | 3  | 2  | 1  | 4    |
|             |      |   |      |          | Niv+TTD   | 62.8 | 45.5 |      | 33  | 4  | 2  | 0  | 0  |      |
|             |      |   |      |          | Niv       | 66.2 | 51.1 |      | 90  | 3  | 0  | 0  | 0  |      |
|             |      |   |      |          | Niv+Ipi   | 60.5 | 58.3 |      | 24  | 3  | 1  | 0  | 0  |      |
| NCT03023423 | 2016 | Y | 1b/2 | NSCLC    | Ate       | 61.7 | 60.9 | 88   | 44  | 1  | 1  | 1  | 1  | -    |
|             |      |   |      |          | Ate+TTD   | 63.2 | 82.6 |      | 44  | 1  | 0  | 0  | 0  |      |
| NCT02008227 | 2013 | Y | 3    | NSCLC    | Chemo     | 62.9 | 61.9 | 1187 | 578 | 4  | 4  | 4  | 4  | 4    |
|             |      |   |      |          | Ate       | 62.7 | 61.8 |      | 609 | 3  | 3  | 1  | 1  |      |
| NCT02302807 | 2015 | Y | 3    | UC       | Chemo     | 66.1 | 77.8 | 902  | 443 | 23 | 12 | 6  | 6  | 4    |
|             |      |   |      |          | Ate       | 65.9 | 76.4 |      | 459 | 54 | 18 | 11 | 11 |      |
| NCT01984242 | 2014 | Y | 2    | RCC      | Ate+TTD   | 61.1 | 73.3 | 304  | 101 | 14 | 1  | 1  | 1  | -    |
|             |      |   |      |          | Ate       | 60.1 | 74.8 |      | 103 | 21 | 4  | 3  | 3  |      |
|             |      |   |      |          | TTD       | 59.7 | 78.2 |      | 100 | 18 | 4  | 1  | 1  |      |
| NCT01903993 | 2013 | Y | 2    | NSCLC    | Chemo     | 61.8 | 53.1 | 277  | 135 | 2  | 2  | 1  | 1  | 4    |

|             |      |   |   |              |           |      |      |      |     |    |   |   |   |      |
|-------------|------|---|---|--------------|-----------|------|------|------|-----|----|---|---|---|------|
|             |      |   |   |              | Ate       | 61.5 | 64.6 |      | 142 | 1  | 1 | 1 | 1 |      |
| Eng         | 2019 | Y | 3 | CRC          | TTD       | 59   | 57   | 349  | 80  | 0  | 0 | 0 | 0 | 4    |
|             |      |   |   |              | Ate+TTD   | 58   | 58   |      | 179 | 2  | 2 | 1 | 1 |      |
|             |      |   |   |              | Ate       | 56   | 66   |      | 90  | 0  | 0 | 0 | 0 |      |
| NCT02625623 | 2015 | Y | 3 | GEC          | Chemo     | 60.1 | 68.3 | 361  | 177 | 2  | 2 | 1 | 1 | 4.03 |
|             |      |   |   |              | Ave       | 58.8 | 75.7 |      | 184 | 0  | 0 | 0 | 0 |      |
| Barlesi     | 2018 | Y | 3 | NSCLC        | Ave       | 64   | 68   | 758  | 393 | 1  | 1 | 1 | 1 | 4.03 |
|             |      |   |   |              | Chemo     | 63   | 69   |      | 365 | 2  | 1 | 0 | 0 |      |
| NCT02580058 | 2015 | Y | 3 | OC           | Ave       | 61   | 0    | 546  | 187 | 2  | 2 | 1 | 1 | 4.03 |
|             |      |   |   |              | Ave+Chemo | 59.5 | 0    |      | 182 | 1  | 1 | 0 | 0 |      |
|             |      |   |   |              | Chemo     | 60.4 | 0    |      | 177 | 1  | 1 | 0 | 0 |      |
| NCT02336165 | 2015 | Y | 2 | Glioblastoma | Dur       | 54   | 83.9 | 119  | 31  | 1  | 1 | - | - | -    |
|             |      |   |   |              | Dur+TTD   | 55.8 | 59.1 |      | 88  | 0  | 0 | - | - |      |
| NCT02558894 | 2015 | Y | 2 | PC           | Dur+Tre   | 61.3 | 46.9 | 64   | 32  | 0  | 0 | 0 | 0 | 4.03 |
|             |      |   |   |              | Dur       | 61.6 | 57.6 |      | 32  | 2  | 2 | 2 | 2 |      |
| Antonia     | 2017 | Y | 3 | NSCLC        | Dur       | 64   | 70.2 | 709  | 475 | 5  | 5 | 2 | 2 | 4.03 |
|             |      |   |   |              | Placebo   | 64   | 70   |      | 234 | 0  | 0 | 0 | 0 |      |
| NCT02369874 | 2015 | Y | 3 | HNSCC        | Dur+Tre   | 59.9 | 84.6 | 723  | 246 | 1  | 1 | 1 | 1 | 4.03 |
|             |      |   |   |              | Dur       | 59   | 84.2 |      | 237 | 2  | 2 | 0 | 0 |      |
|             |      |   |   |              | Chemo     | 59.5 | 83.1 |      | 240 | 1  | 1 | 0 | 0 |      |
| NCT02453282 | 2015 | Y | 3 | NSCLC        | Dur       | 63.2 | 68.4 | 1092 | 369 | 12 | 1 | 5 | 1 | 4.03 |
|             |      |   |   |              | Dur+Tre   | 64.3 | 71.5 |      | 371 | 30 | 2 | 5 | 0 |      |
|             |      |   |   |              | Chemo     | 63.6 | 67.2 |      | 352 | 40 | 3 | 5 | 1 |      |
| NCT02319044 | 2015 | Y | 2 | HNSCC        | Dur+Tre   | 62   | 85   | 263  | 133 | 0  | 0 | - | - | 4.03 |
|             |      |   |   |              | Dur       | 62   | 80.6 |      | 65  | 0  | 0 | - | - |      |
|             |      |   |   |              | Tre       | 61   | 79.1 |      | 65  | 1  | 1 | - | - |      |
| NCT02352948 | 2015 | Y | 3 | NSCLC        | Dur       | 63.2 | 64.2 | 585  | 179 | 6  | 0 | 0 | 0 | -    |
|             |      |   |   |              | Chemo     | 63.9 | 70.9 |      | 173 | 8  | 1 | 0 | 0 |      |
|             |      |   |   |              | Dur+Tre   | 62.5 | 66.1 |      | 173 | 5  | 3 | 1 | 1 |      |
|             |      |   |   |              | Tre       | 63.5 | 65   |      | 60  | 2  | 0 | 0 | 0 |      |
| NCT02409355 | 2015 | Y | 3 | NSCLC        | Ate       | -    | 50   | 8    | 4   | 3  | 1 | - | - | 4    |
|             |      |   |   |              | Chemo     | -    | 100  |      | 4   | 0  | 0 | - | - |      |

|             |      |   |      |          |           |      |      |      |     |    |    |    |   |   |
|-------------|------|---|------|----------|-----------|------|------|------|-----|----|----|----|---|---|
| NCT00094653 | 2004 | Y | 2    | Melanoma | Ipi       | 56.8 | 59.1 | 643  | 131 | 5  | 5  | -  | - | 3 |
|             |      |   |      |          | Ipi+TTD   | 55.6 | 61.3 |      | 380 | 4  | 4  | -  | - |   |
|             |      |   |      |          | TTD       | 57.4 | 53.7 |      | 132 | 1  | 1  | -  | - |   |
| NCT01740297 | 2013 | Y | 1b/2 | Melanoma | Ipi       | 64.2 | 55   | 190  | 95  | 0  | 0  | 0  | - | - |
|             |      |   |      |          | Ipi+TTD   | 63.6 | 63.3 |      | 95  | 2  | 1  | 1  | - |   |
| Le          | 2013 | N | 1    | PC       | Ipi       | 63   | 73   | 30   | 15  | 1  | 1  | -  | - | 3 |
|             |      |   |      |          | Ipi+TTD   | 62   | 67   |      | 15  | 0  | 0  | -  | - |   |
| Hodi        | 2014 | Y | 2    | Melanoma | Ipi+TTD   | 61   | 69.1 | 238  | 118 | 1  | 1  | 0  | 0 | 4 |
|             |      |   |      |          | Ipi       | 64   | 63.9 |      | 120 | 1  | 1  | 1  | 1 |   |
| NCT01471197 | 2012 | Y | 2    | NSCLC    | Ipi       | 62.7 | 66.7 | 8    | 6   | 1  | -  | -  | - | - |
|             |      |   |      |          | Chemo     | 61   | 50   |      | 2   | 0  | -  | -  | - |   |
| NCT01585987 | 2012 | Y | 2    | GEC      | Ipi       | 65   | 63.2 | 108  | 57  | 1  | 1  | 1  | 1 | - |
|             |      |   |      |          | Chemo     | 62   | 71.9 |      | 45  | 0  | 0  | 0  | 0 |   |
|             |      |   |      |          | Placebo   | -    | -    |      | 6   | 0  | 0  | 0  | 0 |   |
| NCT01708941 | 2013 | Y | 2    | Melanoma | Ipi+TTD   | 65   | 68.4 | 43   | 21  | 1  | 0  | 0  | 0 | 4 |
|             |      |   |      |          | Ipi       | 57   | 59.1 |      | 22  | 2  | 1  | 1  | 1 |   |
| NCT00636168 | 2008 | Y | 3    | Melanoma | Ipi       | 50.7 | 62.3 | 945  | 471 | 3  | 3  | -  | - | 3 |
|             |      |   |      |          | Placebo   | 51.5 | 61.6 |      | 474 | 0  | 0  | -  | - |   |
| NCT02158520 | 2013 | Y | 2    | Melanoma | Chemo     | 60   | 66.7 | 24   | 12  | 1  | 0  | 0  | 0 | 4 |
|             |      |   |      |          | Ipi       | 61   | 58.3 |      | 12  | 3  | 3  | 3  | 3 |   |
| NCT01057810 | 2010 | Y | 3    | PCa      | Placebo   | 68.6 | 100  | 598  | 199 | 2  | 2  | -  | - | 3 |
|             |      |   |      |          | Ipi       | 69.3 | 100  |      | 399 | 16 | 16 | -  | - |   |
| NCT00796991 | 2009 | Y | 1    | Melanoma | Ipi+Chemo | 54.5 | 66.7 | 59   | 39  | 4  | 1  | -  | - |   |
|             |      |   |      |          | Ipi       | 60   | 60   |      | 20  | 3  | 1  | -  | - |   |
| Maio        | 2017 | Y | 2    | MESO     | Placebo   | 67   | 80   | 569  | 189 | 4  | 2  | 2  | 1 | 3 |
|             |      |   |      |          | Tre       | 66   | 74   |      | 380 | 20 | 1  | 12 | 5 |   |
| Postow      | 2015 | Y | 2    | Melanoma | Niv+Ipi   | 64   | 66.3 | 140  | 94  | 3  | 1  | -  | - | 4 |
|             |      |   |      |          | Ipi       | 67   | 68.1 |      | 46  | 1  | 0  | -  | - |   |
| Motzer      | 2019 | Y | 3    | RCC      | Niv+Ipi   | 61.1 | 75.1 | 1082 | 547 | 52 | 5  | 12 | 4 | 4 |
|             |      |   |      |          | TTD       | 60.7 | 72.3 |      | 535 | 45 | 5  | 9  | 3 |   |
| NCT01472081 | 2012 | Y | 1    | RCC      | Niv+TTD   | 57.4 | 83   | 100  | 53  | 22 | 4  | 7  | 3 | 4 |
|             |      |   |      |          | Niv+Ipi   | 55.6 | 80.9 |      | 47  | 12 | 1  | 3  | 1 |   |

|             |      |   |     |             |               |      |      |      |     |    |    |    |   |      |
|-------------|------|---|-----|-------------|---------------|------|------|------|-----|----|----|----|---|------|
| Langer      | 2016 | Y | 1/2 | NSCLC       | Pem+Chemo     | 62.5 | 37   | 121  | 59  | 8  | 2  | 2  | 2 | 4    |
|             |      |   |     |             | Chemo         | 63.2 | 41   |      | 62  | 5  | 0  | 1  | 0 |      |
| NCT01928394 | 2013 | Y | 1/2 | Solid Tumor | Niv           | 61.8 | 62   | 793  | 418 | 32 | 11 | 17 | 8 | 4    |
|             |      |   |     |             | Niv+Ipi       | 61   | 57.1 |      | 375 | 29 | 9  | 13 | 5 |      |
| NCT02011945 | 2014 | Y | 1   | CML         | TTD           | 48.5 | 50   | 18   | 2   | 0  | -  | -  | - | 4.03 |
|             |      |   |     |             | Niv+TTD       | 47.1 | 68.8 |      | 16  | 2  | -  | -  | - |      |
| NCT02302339 | 2014 | Y | 2   | Melanoma    | TTD           | -    | 55.3 | 132  | 103 | 12 | 1  | 6  | 0 | 4    |
|             |      |   |     |             | Niv+TTD       | -    | 62.1 |      | 29  | 4  | 2  | 3  | 2 |      |
| NCT03260894 | 2017 | Y | 3   | RCC         | Pem+TTD       | 62.9 | 68.8 | 127  | 64  | 7  | -  | -  | - | 4    |
|             |      |   |     |             | TTD           | 62.1 | 76.9 |      | 63  | 7  | -  | -  | - |      |
| Usmani      | 2019 | Y | 3   | MM          | Pem+Chemo     | 74   | 46   | 294  | 149 | 6  | 6  | 6  | 6 | 4    |
|             |      |   |     |             | Chemo         | 74   | 47   |      | 145 | 1  | 1  | 1  | 1 |      |
| Mateos      | 2019 | Y | 3   | MM          | Pem+Chemo     | 65   | 62   | 241  | 120 | 4  | 4  | 4  | 4 | 4    |
|             |      |   |     |             | Chemo         | 67   | 63   |      | 121 | 4  | 4  | 4  | 4 |      |
| Rini        | 2019 | Y | 3   | RCC         | Pem+TTD       | 62   | 71.3 | 854  | 429 | 54 | 3  | -  | - | 4    |
|             |      |   |     |             | TTD           | 61   | 74.6 |      | 425 | 52 | 3  | -  | - |      |
| Paz-Ares    | 2018 | Y | 3   | NSCLC       | Pem+Chemo     | 65   | 79.1 | 558  | 278 | 2  | 2  | -  | - | 4.03 |
|             |      |   |     |             | Chemo         | 65   | 83.6 |      | 280 | 2  | 2  | -  | - |      |
| NCT02537444 | 2015 | N | 2   | OC          | TTD           | 64.6 | -    | 77   | 38  | 2  | 0  | 0  | 0 | 4.03 |
|             |      |   |     |             | Pem+TTD       | 64.2 | -    |      | 39  | 4  | 1  | 1  | 1 |      |
| NCT02362048 | 2015 | N | 2   | PC          | TTD           | 62.9 | 48.6 | 73   | 35  | 7  | 0  | 2  | 0 | 4.03 |
|             |      |   |     |             | Pem+TTD       | 61.3 | 50   |      | 38  | 8  | 1  | 4  | 1 |      |
| Horn        | 2018 | Y | 3   | SCLC        | Ate+Chemo     | 64   | 64.2 | 394  | 198 | 7  | 4  | 4  | 2 | 4    |
|             |      |   |     |             | Chemo+Placebo | 64   | 65.3 |      | 196 | 2  | 0  | 1  | 0 |      |
| West        | 2019 | Y | 3   | NSCLC       | Ate+Chemo     | 64   | 57   | 705  | 473 | 54 | 13 | 9  | 4 | 4    |
|             |      |   |     |             | Chemo         | 65   | 58   |      | 232 | 18 | 2  | 3  | 1 |      |
| NCT02367794 | 2015 | Y | 3   | NSCLC       | Chemo         | 64.9 | 81.5 | 1000 | 334 | 4  | 1  | 1  | 1 | 4    |
|             |      |   |     |             | Ate+Chemo     | 64.5 | 81.8 |      | 666 | 43 | 7  | 6  | 6 |      |
| NCT02420821 | 2015 | Y | 3   | RCC         | TTD           | 59.9 | 76.4 | 897  | 446 | 49 | 13 | 1  | 1 | 4    |
|             |      |   |     |             | Ate+TTD       | 61.6 | 69.8 |      | 451 | 51 | 16 | 9  | 9 |      |
| NCT02454933 | 2015 | Y | 3   | NSCLC       | TTD           | 62.3 | 23.5 | 29   | 17  | 0  | -  | -  | - | 4.03 |
|             |      |   |     |             | Dur+TTD       | 57.6 | 50   |      | 12  | 1  | -  | -  | - |      |

|             |      |   |      |          |               |      |      |      |     |    |   |   |   |      |
|-------------|------|---|------|----------|---------------|------|------|------|-----|----|---|---|---|------|
| NCT02250326 | 2015 | Y | 2    | NSCLC    | Chemo         | 63.3 | 62.1 | 236  | 158 | 3  | 2 | 2 | 2 | 4    |
|             |      |   |      |          | Dur+Chemo     | 62.7 | 68.4 |      | 78  | 4  | 0 | 0 | 0 |      |
| NCT00324155 | 2006 | Y | 3    | Melanoma | Ipi+Chemo     | 57.5 | 60.8 | 498  | 247 | 5  | 5 | - | - | 3    |
|             |      |   |      |          | Chemo+Placebo | 56.4 | 59.1 |      | 251 | 4  | 4 | - | - |      |
| NCT02279732 | 2014 | Y | 3    | NSCLC    | Ipi+Chemo     | 60.9 | 88.8 | 204  | 98  | 2  | 2 | 1 | 1 | 3    |
|             |      |   |      |          | Chemo+Placebo | 59.8 | 87.7 |      | 106 | 0  | 0 | 0 | 0 |      |
| Gandhi      | 2018 | Y | 3    | NSCLC    | Pem+Chemo     | 65   | 62   | 607  | 405 | 43 | 8 | - | - | 4    |
|             |      |   |      |          | Chemo+Placebo | 63.5 | 52.9 |      | 202 | 11 | 0 | - | - |      |
| NCT02718417 | 2016 | Y | 3    | OC       | Ave+Chemo     | 58.3 | -    | 662  | 328 | 1  | 1 | 1 | 1 | 4.03 |
|             |      |   |      |          | Chemo         | 57.1 | -    |      | 334 | 0  | 0 | 0 | 0 |      |
| NCT01450761 | 2011 | Y | 3    | SCLC     | Ipi+Chemo     | 61.3 | 66.3 | 1123 | 562 | 9  | 9 | 4 | 4 | 3    |
|             |      |   |      |          | Chemo         | 62.6 | 68.5 |      | 561 | 3  | 3 | 1 | 1 |      |
| NCT03273153 | 2017 | Y | 3    | Melanoma | Pem           | 63.5 | 62.9 | 436  | 216 | 1  | 1 | 0 | 0 | 4    |
|             |      |   |      |          | Ate+TTD       | 63.6 | 58.1 |      | 220 | 7  | 7 | 2 | 2 |      |
| NCT02555657 | 2015 | Y | 3    | BC       | Pem           | 51.4 | -    | 601  | 309 | 1  | 1 | 0 | 0 | 4    |
|             |      |   |      |          | Chemo         | 52.6 | 0.6  |      | 292 | 2  | 2 | 2 | 2 |      |
| NCT02340975 | 2015 | Y | 1b/2 | GEC      | Dur           | 59.8 | 79.2 | 113  | 24  | 1  | 0 | 0 | 0 | 4.03 |
|             |      |   |      |          | Tre           | 52.3 | 66.7 |      | 12  | 3  | 3 | 1 | 1 |      |
|             |      |   |      |          | Dur+Tre       | 60.4 | 72.7 |      | 77  | 8  | 3 | 4 | 2 |      |

RAEs, renal adverse events; CTCAE, Common Terminology Criteria for Adverse Events; SCLC, small cell lung cancer; RCC, renal cell carcinoma; HNSCC, Head and Neck Squamous Cell Carcinoma; NSCLC, non-small cell lung cancer; UC, urothelial carcinoma; HCC, hepatocellular carcinoma; GEC, gastric or gastroesophageal junction cancer; CRC, Colorectal Cancer; OC, ovarian cancer; PC, pancreatic cancer; PCa, prostate cancer; MESO, mesothelioma; CML, chronic myeloid leukemia; MM, multiple myeloma; BC, breast cancer; Niv, Nivolumab; Ipi, Ipilimumab; TTD, Targeted therapy drug; Chemo, Chemotherapy; Pem, Pembrolizumab; Ate, Atezolizumab; Ave, Avelumab; Dur, Durvalumab; Tre, Tremelimumab.



**Table S5. Results of traditional pairwise meta-analysis for RAEs**

| Comparisons                | N  | n    | Tau <sup>2a</sup> | I <sup>2</sup> | Q     | RR (95% CI) <sup>b</sup> |
|----------------------------|----|------|-------------------|----------------|-------|--------------------------|
| PD1 vs. Placebo            | 3  | 1976 | 0                 | 0              | 0.58  | 1.85 (0.81-4.20)         |
| PD1+CTLA4 vs Placebo       | 1  | 551  | NA                | NA             | NA    | <b>3.06 (1.33-7.01)</b>  |
| PDL1 vs. Placebo           | 1  | 709  | NA                | NA             | NA    | 5.37 (0.30-96.8)         |
| CTLA4 vs. Placebo          | 5  | 2438 | 0                 | 0              | 2.63  | <b>2.85 (1.35-6.01)</b>  |
| PD1 vs. Chemo+TTD          | 4  | 1467 | 0                 | 0              | 0.36  | <b>0.43 (0.22-0.84)</b>  |
| PD1+TTD vs. Chemo+TTD      | 1  | 68   | NA                | NA             | NA    | 1.00 (0.27-3.71)         |
| PD1+ Chemo vs. Chemo+TTD   | 1  | 563  | NA                | NA             | NA    | <b>1.95 (1.15-3.30)</b>  |
| PDL1 vs. Chemo+TTD         | 2  | 829  | 0                 | 0              | 0.58  | 0.86 (0.33-2.23)         |
| CTLA4 vs. Chemo+TTD        | 2  | 257  | 0                 | 0              | 0.90  | 1.12 (0.32-3.87)         |
| CTLA4+ Chemo vs. Chemo+TTD | 2  | 832  | 0                 | 0              | 0.08  | 0.67 (0.24-1.87)         |
| PD1 vs. Chemo              | 16 | 7893 | 0.28              | 33.9           | 22.70 | 1.16 (0.70-1.91)         |
| PD1+ Chemo vs. Chemo       | 3  | 1093 | 0.04              | 4.1            | 2.09  | 1.49 (0.54-4.09)         |
| PDL1 vs. Chemo             | 8  | 4578 | 1.04              | 73.9           | 26.83 | 0.81 (0.31-2.11)         |
| PDL1+ Chemo vs. Chemo      | 5  | 2883 | 0.16              | 29.0           | 5.64  | <b>1.99 (1.03-3.85)</b>  |
| PDL1+ CTLA4 vs. Chemo      | 1  | 723  | NA                | NA             | NA    | 0.73 (0.47-1.15)         |
| CTLA4 vs. Chemo            | 2  | 110  | 0                 | 0              | 0.11  | 1.57 (0.18-13.5)         |
| CTLA4+ Chemo vs. Chemo     | 1  | 1123 | NA                | NA             | NA    | 2.96 (0.81-10.9)         |
| PD1 vs. TTD                | 1  | 803  | NA                | NA             | NA    | 1.20 (0.87-1.65)         |
| PD1+CTLA4 vs. TTD          | 1  | 1082 | NA                | NA             | NA    | 1.12 (0.76-1.64)         |
| PD1+TTD vs. TTD            | 6  | 1281 | 0                 | 0              | 0.57  | 1.05 (0.78-1.41)         |
| PDL1 vs. TTD               | 2  | 373  | NA                | NA             | NA    | 1.11 (0.62-1.98)         |
| PDL1+TTD vs. TTD           | 4  | 1386 | 0                 | 0              | 1.47  | 0.99 (0.72-1.36)         |
| CTLA4 vs. CTLA4+ Chemo     | 1  | 59   | NA                | NA             | NA    | 1.40 (0.34-5.74)         |
| PD1 vs. CTLA4              | 2  | 1157 | 0.44              | 37.9           | 1.61  | 0.84 (0.19-3.75)         |
| PD1+ CTLA4 vs. CTLA4       | 1  | 624  | NA                | NA             | NA    | 2.71 (0.99-7.42)         |
| PDL1 vs. CTLA4             | 3  | 405  | 0                 | 0              | 1.49  | 0.54 (0.16-1.75)         |
| PDL1+CTLA4 vs. CTLA4       | 3  | 520  | 0                 | 0              | 0.91  | 0.53 (0.21-1.33)         |
| PDL1 vs. PDL1+ Chemo       | 1  | 369  | NA                | NA             | NA    | 1.94 (0.18-21.2)         |
| PD1 vs. PDL1+ TTD          | 1  | 436  | NA                | NA             | NA    | 0.15 (0.02-1.20)         |
| PDL1 vs. PDL1+ TTD         | 4  | 680  | 0                 | 0              | 1.89  | 1.39 (0.77-2.50)         |
| PDL1 vs. PDL1+ CTLA4       | 6  | 1938 | 0.18              | 24.3           | 5.29  | 0.72 (0.35-1.49)         |
| PD1 vs. PD1+ Chemo         | 3  | 1226 | 0                 | 0              | 1.72  | <b>0.32 (0.21-0.48)</b>  |
| PD1+CTLA4 vs. PD1+ Chemo   | 1  | 80   | NA                | NA             | NA    | 0.73 (0.33-2.46)         |
| PD1+TTD vs. PD1+ Chemo     | 1  | 89   | NA                | NA             | NA    | 0.71 (0.24-2.12)         |
| PD1 vs. PD1+ TTD           | 6  | 475  | 0                 | 0              | 5.00  | <b>0.57 (0.34-0.94)</b>  |
| PD1+CTLA4 vs. PD1+ TTD     | 2  | 157  | 0                 | 0              | 0.25  | 0.74 (0.42-1.30)         |
| PD1 vs. PD1+CTLA4          | 5  | 2258 | 0.25              | 55.7           | 9.03  | <b>0.49 (0.27-0.91)</b>  |
| Chemo vs. Placebo          | 1  | 51   | NA                | NA             | NA    | NA                       |

RAEs, renal adverse events; N, number of trials; n, number of patients; RR, risk ratio; CI, confidence interval; PD-1, programmed cell death 1; PD-L1, programmed cell death ligand 1; CTLA4, cytotoxic T-lymphocyte antigen 4; Chemo, Chemotherapy; TTD, Targeted therapy drug; NA, no available.

<sup>a</sup> Tau<sup>2</sup> represents between-study heterogeneity characterized by standard deviation.

<sup>b</sup> Bold values denote statistical significance.

**Table S6. Network estimates of treatment comparisons for AKI and grade 3-5 AKI**

|                                   |                             |                                   |                                   |                                   |                                   |                            |                                   |                                   |                                  |                                   |                                   |                                   |                                   |
|-----------------------------------|-----------------------------|-----------------------------------|-----------------------------------|-----------------------------------|-----------------------------------|----------------------------|-----------------------------------|-----------------------------------|----------------------------------|-----------------------------------|-----------------------------------|-----------------------------------|-----------------------------------|
| <b>PD-1</b>                       | 1.40<br>(0.57-3.60)         | 0.67<br>(0.27-1.65)               | <b>0.44</b><br><b>(0.18-0.95)</b> | 0.81<br>(0.32-2.07)               | 1.61<br>(0.37-8.25)               | 1.23<br>(0.39-4.38)        | 0.76<br>(0.24-2.47)               | 0.41<br>(0.09-1.76)               | 0.34<br>(0.05-1.93)              | <b>4.40</b><br><b>(1.78-13.0)</b> | 0.63<br>(0.29-1.25)               | 0.65<br>(0.23-1.79)               | <b>9.71</b><br><b>(1.43-321)</b>  |
| 1.06<br>(0.52-2.04)               | <b>PD1+</b><br><b>CTLA4</b> | 0.48<br>(0.15-1.48)               | <b>0.31</b><br><b>(0.09-0.98)</b> | 0.57<br>(0.17-2.03)               | 1.15<br>(0.20-7.12)               | 0.88<br>(0.22-3.82)        | 0.54<br>(0.12-2.28)               | 0.29<br>(0.05-1.56)               | 0.24<br>(0.03-1.64)              | <b>3.12</b><br><b>(1.07-10.8)</b> | 0.45<br>(0.13-1.32)               | 0.46<br>(0.11-1.69)               | 6.96<br>(0.84-233)                |
| 0.73<br>(0.38-1.37)               | 0.69<br>(0.31-1.51)         | <b>PD1+</b><br><b>TTD</b>         | 0.65<br>(0.19-2.01)               | 1.20<br>(0.35-4.09)               | 2.41<br>(0.44-14.9)               | 1.84<br>(0.46-7.91)        | 1.14<br>(0.26-4.85)               | 0.61<br>(0.11-3.22)               | 0.50<br>(0.06-3.46)              | <b>6.58</b><br><b>(2.15-23.1)</b> | 0.93<br>(0.29-2.75)               | 0.96<br>(0.26-3.39)               | <b>14.5</b><br><b>(1.74-489)</b>  |
| <b>0.45</b><br><b>(0.20-0.93)</b> | 0.43<br>(0.15-1.12)         | 0.62<br>(0.23-1.55)               | <b>PD1+</b><br><b>Chemo</b>       | 1.86<br>(0.67-5.66)               | 3.72<br>(0.79-20.7)               | 2.83<br>(0.77-12.9)        | 1.75<br>(0.52-6.40)               | 0.93<br>(0.20-4.62)               | 0.77<br>(0.11-4.90)              | <b>10.1</b><br><b>(3.21-41.8)</b> | 1.44<br>(0.62-3.40)               | 1.48<br>(0.49-4.69)               | <b>22.4</b><br><b>(2.87-841)</b>  |
| 0.77<br>(0.33-1.67)               | 0.73<br>(0.27-1.99)         | 1.05<br>(0.39-2.81)               | 1.68<br>(0.67-4.40)               | <b>PDL1</b>                       | 1.99<br>(0.51-8.84)               | 1.54<br>(0.48-5.24)        | 0.94<br>(0.27-3.17)               | 0.50<br>(0.12-2.12)               | 0.41<br>(0.06-2.50)              | <b>5.40</b><br><b>(1.81-19.3)</b> | 0.78<br>(0.34-1.59)               | 0.80<br>(0.24-2.56)               | <b>12.0</b><br><b>(1.63-414)</b>  |
| 0.84<br>(0.27-2.44)               | 0.79<br>(0.23-2.81)         | 1.15<br>(0.33-3.96)               | 1.84<br>(0.57-6.23)               | 1.09<br>(0.43-2.82)               | <b>PDL1+</b><br><b>CTLA4</b>      | 0.76<br>(0.13-4.58)        | 0.47<br>(0.08-2.63)               | 0.25<br>(0.05-1.34)               | 0.21<br>(0.02-1.77)              | 2.73<br>(0.46-16.2)               | 0.39<br>(0.08-1.57)               | 0.40<br>(0.07-1.88)               | 6.14<br>(0.58-245)                |
| 0.90<br>(0.29-2.64)               | 0.85<br>(0.25-2.92)         | 1.24<br>(0.36-4.05)               | 1.97<br>(0.55-7.30)               | 1.17<br>(0.38-3.68)               | 1.07<br>(0.26-4.43)               | <b>PDL1+</b><br><b>TTD</b> | 0.61<br>(0.12-2.89)               | 0.32<br>(0.06-1.89)               | 0.27<br>(0.03-2.03)              | <b>3.52</b><br><b>(1.13-12.6)</b> | 0.50<br>(0.13-1.66)               | 0.52<br>(0.11-2.22)               | 7.98<br>(0.84-298)                |
| 0.72<br>(0.26-1.87)               | 0.67<br>(0.20-2.14)         | 0.98<br>(0.30-3.06)               | 1.57<br>(0.56-4.63)               | 0.93<br>(0.33-2.59)               | 0.84<br>(0.24-3.11)               | 0.81<br>(0.20-3.11)        | <b>PDL1+</b><br><b>Chemo</b>      | 0.54<br>(0.09-3.02)               | 0.44<br>(0.06-2.89)              | <b>5.80</b><br><b>(1.44-27.4)</b> | 0.82<br>(0.30-2.17)               | 0.84<br>(0.20-3.58)               | <b>12.9</b><br><b>(1.41-493)</b>  |
| 0.46<br>(0.12-1.71)               | 0.43<br>(0.10-1.87)         | 0.62<br>(0.15-2.67)               | 1.00<br>(0.26-4.28)               | 0.59<br>(0.17-2.23)               | 0.54<br>(0.14-2.29)               | 0.51<br>(0.10-2.67)        | 0.63<br>(0.14-3.03)               | <b>CTLA4</b>                      | 0.83<br>(0.08-7.12)              | <b>10.7</b><br><b>(2.10-63.3)</b> | 1.53<br>(0.35-6.48)               | 1.57<br>(0.35-6.76)               | <b>24.4</b><br><b>(2.89-894)</b>  |
| 0.38<br>(0.06-2.11)               | 0.36<br>(0.05-2.18)         | 0.52<br>(0.08-3.21)               | 0.84<br>(0.13-5.01)               | 0.49<br>(0.08-2.72)               | 0.46<br>(0.06-2.86)               | 0.42<br>(0.05-2.91)        | 0.53<br>(0.08-3.28)               | 0.82<br>(0.09-6.43)               | <b>CTLA4+</b><br><b>Chemo</b>    | <b>13.3</b><br><b>(1.92-119)</b>  | 1.88<br>(0.34-11.1)               | 1.92<br>(0.27-15.2)               | <b>30.7</b><br><b>(2.27-1560)</b> |
| <b>2.18</b><br><b>(1.07-4.67)</b> | 2.07<br>(0.97-4.89)         | <b>3.01</b><br><b>(1.44-6.68)</b> | <b>4.82</b><br><b>(1.83-14.5)</b> | <b>2.85</b><br><b>(1.08-7.98)</b> | 2.61<br>(0.77-9.58)               | 2.45<br>(0.86-7.48)        | 3.06<br>(0.98-10.6)               | <b>4.80</b><br><b>(1.12-20.7)</b> | 5.86<br>(0.92-41.4)              | <b>TTD</b>                        | <b>0.14</b><br><b>(0.04-0.40)</b> | <b>0.15</b><br><b>(0.03-0.53)</b> | 2.20<br>(0.25-74.6)               |
| 0.72<br>(0.36-1.29)               | 0.68<br>(0.26-1.59)         | 0.98<br>(0.39-2.25)               | 1.57<br>(0.74-3.38)               | 0.93<br>(0.47-1.76)               | 0.85<br>(0.31-2.26)               | 0.80<br>(0.24-2.47)        | 1.00<br>(0.42-2.27)               | 1.59<br>(0.40-5.37)               | 1.87<br>(0.38-10.6)              | <b>0.33</b><br><b>(0.12-0.77)</b> | <b>Chemo</b>                      | 1.03<br>(0.35-3.19)               | <b>15.6</b><br><b>(2.17-561)</b>  |
| 0.59<br>(0.23-1.48)               | 0.57<br>(0.18-1.72)         | 0.82<br>(0.27-2.39)               | 1.31<br>(0.48-3.78)               | 0.77<br>(0.26-2.27)               | 0.71<br>(0.20-2.48)               | 0.66<br>(0.17-2.71)        | 0.83<br>(0.23-3.00)               | 1.30<br>(0.33-4.89)               | 1.58<br>(0.24-11.3)              | <b>0.27</b><br><b>(0.08-0.84)</b> | 0.83<br>(0.31-2.32)               | <b>Chemo+</b><br><b>TTD</b>       | <b>15.5</b><br><b>(1.88-530)</b>  |
| <b>4.58</b><br><b>(1.00-38.3)</b> | 4.37<br>(0.86-39.6)         | <b>6.34</b><br><b>(1.24-57.8)</b> | <b>10.2</b><br><b>(1.98-96.8)</b> | <b>6.03</b><br><b>(1.21-52.6)</b> | <b>5.58</b><br><b>(1.01-52.8)</b> | 5.27<br>(0.86-52.3)        | <b>6.45</b><br><b>(1.13-65.4)</b> | <b>10.1</b><br><b>(2.21-80.1)</b> | <b>12.8</b><br><b>(1.16-201)</b> | 2.10<br>(0.41-19.0)               | <b>6.43</b><br><b>(1.39-58.2)</b> | <b>7.80</b><br><b>(1.43-76.4)</b> | <b>Placebo</b>                    |

Network estimates of treatment comparisons for AKI (on the lower triangle) and grade 3-5 AKI (on the upper triangle). The summary estimates are risk ratios (RRs) and 95% confidence intervals. For AKI, the column-defining treatment is compared to the row-defining treatment, and RRs < 1 favor the column-defining treatment. For grade 3-5 AKI, the row-defining treatment is compared to the column-defining treatment, and RRs < 1 favor the row-defining treatment.

Significant results are in bold.

AKI, acute kidney injury; PD-1, programmed cell death 1; PD-L1, programmed cell death ligand 1; CTLA4, cytotoxic T-lymphocyte antigen 4; Chemo, Chemotherapy; TTD, Targeted therapy drug.

**Table S7. Evaluation of the model fit**

| <b>Model assumption</b> | <b>Dbar</b> | <b>Pd</b> | <b># of data points</b> | <b>Deviance Information Criterion</b> |
|-------------------------|-------------|-----------|-------------------------|---------------------------------------|
| Random consistency      | 232         | 122       | 208                     | 354                                   |
| Random inconsistency    | 226         | 136       | 208                     | 362                                   |
| Fixed consistency       | 306         | 97        | 208                     | 403                                   |
| Fixed inconsistency     | 284         | 118       | 208                     | 402                                   |

Deviance Information Criterion (DIC) is the sum of the posterior mean of the residual deviance and the Pd, and provides a measure of model fit that penalizes model complexity - lower values of the DIC suggest a more parsimonious model. The DIC is particularly useful for comparing different parameter models for the same likelihood and data. As shown in this table, the random consistency model is more parsimonious than the other three models.

**Table S8. Evaluation of local inconsistency for RAEs using node-split model**

| Comparison              | Direct risk ratio | Indirect risk ratio | Ratio of risk ratios | P-value      |
|-------------------------|-------------------|---------------------|----------------------|--------------|
| CTLA4 vs Chemo          | 0.65 (0.07-6.17)  | 1.58 (0.84-3.01)    | 0.41 (0.04-4.22)     | 0.426        |
| CTLA4+Chemo vs Chemo    | 2.40 (0.54-12.3)  | 1.25 (0.39-3.97)    | 1.92 (0.27-13.4)     | 0.494        |
| PD1 vs Chemo            | 0.92 (0.60-1.41)  | 0.46 (0.24-0.87)    | 2.00 (0.92-4.33)     | 0.073        |
| PD1+Chemo vs Chemo      | 1.20 (0.44-3.34)  | 2.43 (1.29-4.51)    | 0.49 (0.15-1.63)     | 0.246        |
| PDL1 vs Chemo           | 0.75 (0.42-1.29)  | 1.39 (0.63-3.14)    | 0.54 (0.20-1.44)     | 0.205        |
| PDL1+Chemo vs Chemo     | 1.73 (0.88-3.36)  | 4.05 (0.70-27.7)    | 0.43 (0.06-3.02)     | 0.376        |
| PDL1+CTLA4 vs Chemo     | 0.69 (0.28-1.69)  | 0.73 (0.31-1.67)    | 0.95 (0.28-3.24)     | 0.927        |
| CTLA4 vs Chemo+TTD      | 0.95 (0.25-3.22)  | 0.90 (0.36-2.27)    | 1.06 (0.22-5.10)     | 0.952        |
| PD1 vs Chemo+TTD        | 0.32 (0.13-0.76)  | 0.59 (0.22-1.63)    | 0.54 (0.14-2.06)     | 0.363        |
| PD1+Chemo vs Chemo+TTD  | 2.00 (0.70-5.80)  | 0.97 (0.39-2.35)    | 2.06 (0.52-8.25)     | 0.291        |
| PD1+TTD vs Chemo+TTD    | 0.81 (0.16-4.01)  | 0.87 (0.41-1.87)    | 0.93 (0.16-5.52)     | 0.937        |
| PDL1 vs Chemo+TTD       | 0.72 (0.22-2.34)  | 0.59 (0.25-1.37)    | 1.22 (0.28-5.24)     | 0.790        |
| PDL1+CTLA4 vs Chemo+TTD | 0.53 (0.14-1.83)  | 0.51 (0.18-1.41)    | 1.04 (0.20-5.39)     | 0.979        |
| CTLA4+Chemo vs CTLA4    | 0.55 (0.10-2.89)  | 1.58 (0.48-5.34)    | 0.35 (0.04-2.76)     | 0.301        |
| PD1 vs CTLA4            | 0.63 (0.18-2.11)  | 0.38 (0.19-0.76)    | 1.66 (0.40-6.81)     | 0.485        |
| PD1+CTLA4 vs CTLA4      | 2.43 (0.70-9.28)  | 0.59 (0.28-1.23)    | 4.12 (0.93-18.3)     | 0.055        |
| PDL1 vs CTLA4           | 0.31 (0.09-0.98)  | 0.91 (0.41-2.04)    | 0.34 (0.08-1.44)     | 0.132        |
| PDL1+CTLA4 vs CTLA4     | 0.35 (0.13-1.00)  | 0.77 (0.26-2.18)    | 0.45 (0.10-1.98)     | 0.303        |
| Placebo vs CTLA4        | 0.21 (0.08-0.52)  | 0.15 (0.05-0.45)    | 1.40 (0.33-5.93)     | 0.646        |
| PD1+Chemo vs PD1        | 3.45 (1.78-6.85)  | 1.53 (0.66-3.56)    | 2.25 (0.77-6.63)     | 0.137        |
| PD1+CTLA4 vs PD1        | 1.88 (1.07-3.40)  | 1.03 (0.45-2.31)    | 1.83 (0.67-4.97)     | 0.220        |
| PD1+TTD vs PD1          | 1.82 (0.99-3.45)  | 1.67 (0.86-3.29)    | 1.09 (0.44-2.72)     | 0.849        |
| PDL1+TTD vs PD1         | 3.94 (0.69-35.1)  | 0.99 (0.48-2.03)    | 3.98 (0.49-32.3)     | 0.155        |
| Placebo vs PD1          | 0.36 (0.12-1.00)  | 0.37 (0.12-1.05)    | 0.97 (0.21-4.43)     | 0.978        |
| TTD vs PD1              | 0.80 (0.31-2.13)  | 1.32 (0.76-2.26)    | 0.61 (0.20-1.83)     | 0.369        |
| PD1+CTLA4 vs PD1+Chemo  | 0.58 (0.10-2.50)  | 0.60 (0.30-1.26)    | 0.97 (0.17-5.63)     | 0.962        |
| PD1+TTD vs PD1+Chemo    | 0.58 (0.13-2.37)  | 0.68 (0.34-1.38)    | 0.85 (0.17-4.27)     | 0.859        |
| PD1+TTD vs PD1+CTLA4    | 1.25 (0.50-3.09)  | 0.98 (0.51-1.91)    | 1.28 (0.41-3.93)     | 0.671        |
| Placebo vs PD1+CTLA4    | 0.29 (0.08-0.98)  | 0.19 (0.06-0.51)    | 1.53 (0.29-7.93)     | 0.599        |
| TTD vs PD1+CTLA4        | 0.87 (0.32-2.37)  | 0.67 (0.34-1.30)    | 1.30 (0.39-4.33)     | 0.667        |
| TTD vs PD1+TTD          | 0.79 (0.45-1.37)  | 0.48 (0.23-1.00)    | 1.65 (0.65-4.14)     | 0.281        |
| PDL1+Chemo vs PDL1      | 0.27 (0.01-2.99)  | 2.23 (1.03-4.90)    | 0.12 (0.01-2.32)     | 0.104        |
| PDL1+TTD vs PDL1        | 0.52 (0.21-1.27)  | 2.00 (0.70-6.21)    | 0.26 (0.06-1.07)     | 0.055        |
| Placebo vs PDL1         | 0.01 (0.01-0.08)  | 0.33 (0.14-0.76)    | 0.03 (0.01-0.12)     | <b>0.014</b> |
| TTD vs PDL1             | 0.76 (0.26-2.16)  | 1.01 (0.49-2.06)    | 0.75 (0.21-2.70)     | 0.651        |
| TTD vs PDL1+TTD         | 0.83 (0.40-1.66)  | 1.21 (0.29-5.02)    | 0.69 (0.14-3.38)     | 0.640        |

The ratio of risk ratios for direct and indirect estimates with their 95% confidence intervals. A confidence interval including 1 indicates there is no statistically detectable inconsistency between direct and indirect treatment estimates. Bold values denote statistical significance.

RAEs, renal adverse events; TTD, Targeted therapy drug; Chemo, Chemotherapy; PD-1, programmed cell death 1; PD-L1, programmed cell death ligand 1; CTLA4, cytotoxic T-lymphocyte antigen 4.

**Table S9. Subgroup analyses and meta-regression of network meta-analysis**

| Treatment regimens         | Primary and secondary outcomes |                         |                         |                         | Meta-regression         |                         |                         |
|----------------------------|--------------------------------|-------------------------|-------------------------|-------------------------|-------------------------|-------------------------|-------------------------|
|                            | All-grade RAEs                 | Grade 3-5 RAEs          | All-grade AKI           | Grade 3-5 AKI           | Median age              | Male                    | Cancer type             |
| PD1+CTLA4                  | <b>1.60 (1.02-2.55)</b>        | 0.97 (0.50-1.89)        | 0.95 (0.49-1.91)        | 0.71 (0.28-1.74)        | 1.54 (0.97-2.46)        | <b>1.64 (1.04-2.63)</b> | <b>1.82 (1.17-2.86)</b> |
| PD1+TTD                    | <b>1.76 (1.14-2.75)</b>        | 1.65 (0.82-3.43)        | 1.37 (0.73-2.66)        | 1.49 (0.61-3.69)        | <b>1.77 (1.14-2.79)</b> | <b>1.79 (1.15-2.84)</b> | <b>1.91 (1.25-2.95)</b> |
| PD1+Chemo                  | <b>2.69 (1.62-4.42)</b>        | <b>1.86 (1.05-3.55)</b> | <b>2.21 (1.08-4.99)</b> | <b>2.29 (1.05-5.60)</b> | <b>2.63 (1.58-4.33)</b> | <b>2.61 (1.56-4.33)</b> | <b>2.49 (1.53-4.03)</b> |
| PDL1                       | 1.29 (0.79-2.12)               | 1.15 (0.62-2.14)        | 1.31 (0.60-3.00)        | 1.23 (0.48-3.12)        | 1.21 (0.73-2.01)        | 1.25 (0.76-2.07)        | 1.33 (0.83-2.14)        |
| PDL1+CTLA4                 | 1.10 (0.55-2.16)               | 0.81 (0.29-2.17)        | 1.20 (0.41-3.66)        | 0.62 (0.12-2.72)        | 1.07 (0.53-2.10)        | 1.06 (0.52-2.10)        | 1.13 (0.58-2.15)        |
| PDL1+TTD                   | 1.20 (0.62-2.34)               | 0.68 (0.29-1.47)        | 1.11 (0.38-3.48)        | 0.81 (0.23-2.57)        | 1.16 (0.60-2.29)        | 1.20 (0.61-2.38)        | 1.27 (0.67-2.40)        |
| PDL1+Chemo                 | <b>2.49 (1.25-4.95)</b>        | 1.86 (0.78-4.67)        | 1.40 (0.54-3.91)        | 1.31 (0.40-4.26)        | <b>2.53 (1.26-5.04)</b> | <b>2.41 (1.18-4.94)</b> | <b>2.51 (1.30-4.85)</b> |
| CTLA4                      | <b>1.95 (1.10-3.51)</b>        | <b>3.04 (1.30-7.20)</b> | 2.20 (0.58-8.06)        | 2.46 (0.57-10.6)        | <b>1.90 (1.06-3.42)</b> | <b>1.94 (1.08-3.65)</b> | <b>1.97 (1.11-3.51)</b> |
| CTLA4+Chemo                | 2.12 (0.85-5.37)               | 2.11 (0.79-5.78)        | 2.66 (0.47-16.7)        | 2.98 (0.52-20.4)        | 2.10 (0.84-5.36)        | 2.05 (0.82-5.22)        | 2.07 (0.86-5.06)        |
| TTD                        | 1.17 (0.73-1.87)               | 0.55 (0.28-1.05)        | <b>0.46 (0.21-0.93)</b> | <b>0.23 (0.08-0.56)</b> | 1.12 (0.69-1.82)        | 1.18 (0.73-1.92)        | 1.31 (0.82-2.06)        |
| Chemo                      | 1.34 (0.95-1.91)               | 1.45 (0.89-2.49)        | 1.40 (0.78-2.82)        | 1.59 (0.80-3.47)        | 1.39 (0.97-1.98)        | 1.27 (0.88-1.83)        | 1.37 (0.98-1.93)        |
| Chemo+TTD                  | <b>2.07 (1.16-3.77)</b>        | 1.45 (0.63-3.34)        | 1.69 (0.67-4.34)        | 1.53 (0.56-4.44)        | <b>2.01 (1.11-3.67)</b> | <b>1.97 (1.08-3.65)</b> | <b>1.93 (1.09-3.46)</b> |
| Placebo                    | <b>0.37 (0.17-0.76)</b>        | <b>0.32 (0.10-0.83)</b> | <b>0.20 (0.03-0.99)</b> | <b>0.10 (0.01-0.70)</b> | <b>0.36 (0.17-0.74)</b> | <b>0.37 (0.17-0.76)</b> | <b>0.40 (0.19-0.79)</b> |
| PD1                        | Reference                      | Reference               | Reference               | Reference               | Reference               | Reference               | Reference               |
| DIC                        | 354                            | 333                     | 235                     | 226                     | 345                     | 346                     | 353                     |
| Number of studies          | 95                             | 90                      | 63                      | 62                      | 93                      | 92                      | 95                      |
| Heterogeneity <sup>a</sup> | 0.20 (0.09-0.40)               | 0.12 (0.00-0.57)        | 0.12 (0.00-0.64)        | 0.17 (0.00-1.00)        | 0.21 (0.10-0.41)        | 0.21 (0.10-0.42)        | 0.17 (0.07-0.36)        |

Data are risk ratios with their 95% confidence intervals after adjusting covariates: median age, proportion of male and cancer type.

<sup>a</sup>Heterogeneity was assessed using the posterior median between trial variance, tau<sup>2</sup>.

Significant results are in bold.

RAEs, renal adverse events; AKI, acute kidney injury; TTD, Targeted therapy drug; Chemo, Chemotherapy; PD-1, programmed cell death 1; PD-L1, programmed cell death ligand 1; CTLA4, cytotoxic T-lymphocyte antigen 4; DIC, deviance information criterion.

**Table S10. SUCRA values stratified by cancer types**

| Treatment regimens | Respiratory system |       | Digestive system |       | Urogenital system |       | Hematologic system |       | Skin    |       |
|--------------------|--------------------|-------|------------------|-------|-------------------|-------|--------------------|-------|---------|-------|
|                    | Ranking            | SUCRA | Ranking          | SUCRA | Ranking           | SUCRA | Ranking            | SUCRA | Ranking | SUCRA |
| <b>PD1</b>         | 8                  | 45.8  | 6                | 44.6  | 6                 | 34.9  | 6                  | 39.6  | 1       | 83.4  |
| <b>PD1+CTLA4</b>   | 12                 | 33.3  | -                | -     | 4                 | 55.8  | 10                 | 17.4  | -       | -     |
| <b>PD1+TTD</b>     | 11                 | 35.1  | 8                | 16.0  | 7                 | 32.1  | 7                  | 36.7  | 5       | 44.2  |
| <b>PD1+Chemo</b>   | 10                 | 36.6  | 7                | 34.2  | -                 | -     | 2                  | 92.9  | 6       | 29.8  |
| <b>PDL1</b>        | 4                  | 74.3  | 2                | 73.6  | 8                 | 15.6  | -                  | -     | 4       | 55.9  |
| <b>PDL1+CTLA4</b>  | 5                  | 61.5  | 3                | 73.0  | -                 | -     | -                  | -     | 2       | 78.9  |
| <b>PDL1+TTD</b>    | 1                  | 79.3  | 9                | 14.0  | 3                 | 57.1  | 11                 | 14.0  | -       | -     |
| <b>PDL1+Chemo</b>  | 13                 | 32.5  | -                | -     | 2                 | 73.9  | -                  | -     | -       | -     |
| <b>CTLA4</b>       | 9                  | 41.1  | 5                | 49.2  | -                 | -     | 8                  | 32.9  | 7       | 0.4   |
| <b>CTLA4+Chemo</b> | 14                 | 11.0  | -                | -     | -                 | -     | 5                  | 48.4  | -       | -     |
| <b>Placebo</b>     | 2                  | 78.7  | 1                | 94.5  | -                 | -     | 3                  | 73.9  | -       | -     |
| <b>TTD</b>         | 3                  | 77.6  | -                | 15.2  | 5                 | 51.1  | 8                  | 32.9  | -       | -     |
| <b>Chemo</b>       | 6                  | 60.7  | 4                | 59.9  | 1                 | 76.9  | 1                  | 96.9  | -       | -     |
| <b>Chemo+TTD</b>   | 7                  | 48.6  | -                | -     | -                 | -     | 4                  | 65.6  | 3       | 57.2  |

SUCRA, surface under the cumulative ranking; TTD, Targeted therapy drug; Chemo, Chemotherapy; PD-1, programmed cell death 1; PD-L1, programmed cell death ligand 1; CTLA4, cytotoxic T-lymphocyte antigen 4.

**Table S11. Sensitivity analyses of network meta-analysis**

| Treatment regimens         | All-grade RAEs          | Exclude 5 single-center studies | Exclude 19 studies with sample size less than 100 | Exclude 16 studies using CTCAE version 3.0 | Exclude 11 studies with data of phrase 1 trials | Exclude 12 studies performed before 2013 | Exclude 19 studies with high overall risk of bias | Exclude 11 studies with fibrosis, PRF and CKD patients |
|----------------------------|-------------------------|---------------------------------|---------------------------------------------------|--------------------------------------------|-------------------------------------------------|------------------------------------------|---------------------------------------------------|--------------------------------------------------------|
| PD1+CTLA4                  | <b>1.60 (1.02-2.55)</b> | <b>1.58 (1.00-2.55)</b>         | 1.61 (0.99-2.68)                                  | <b>1.67 (1.04-2.74)</b>                    | 1.81 (0.92-3.60)                                | 1.66 (0.92-3.04)                         | <b>1.72 (1.03-2.89)</b>                           | <b>1.73 (1.10-2.78)</b>                                |
| PD1+TTD                    | <b>1.76 (1.14-2.75)</b> | <b>1.65 (1.00-2.77)</b>         | 1.70 (0.88-3.31)                                  | <b>1.86 (1.17-3.02)</b>                    | <b>1.67 (1.01-2.83)</b>                         | <b>1.73 (1.02-2.99)</b>                  | 1.68 (0.85-3.35)                                  | <b>1.75 (1.17-2.68)</b>                                |
| PD1+Chemo                  | <b>2.69 (1.62-4.42)</b> | <b>2.65 (1.58-4.39)</b>         | <b>2.70 (1.57-4.57)</b>                           | <b>2.58 (1.50-4.39)</b>                    | <b>2.64 (1.45-4.73)</b>                         | <b>2.60 (1.42-4.65)</b>                  | <b>2.67 (1.55-4.50)</b>                           | <b>2.88 (1.81-4.54)</b>                                |
| PDL1                       | 1.29 (0.79-2.12)        | 1.27 (0.77-2.11)                | 1.12 (0.66-1.92)                                  | 0.93 (0.50-1.73)                           | 1.38 (0.82-2.35)                                | 1.30 (0.76-2.20)                         | 0.92 (0.51-1.67)                                  | 1.20 (0.68-2.11)                                       |
| PDL1+CTLA4                 | 1.10 (0.55-2.16)        | 1.08 (0.54-2.15)                | 1.16 (0.55-2.39)                                  | 0.87 (0.38-1.94)                           | 1.08 (0.48-2.31)                                | 1.07 (0.51-2.19)                         | 1.03 (0.49-2.15)                                  | 0.80 (0.33-1.86)                                       |
| PDL1+TTD                   | 1.20 (0.62-2.34)        | 1.17 (0.59-2.33)                | 1.08 (0.51-2.28)                                  | 2.08 (0.86-5.53)                           | 1.29 (0.63-2.68)                                | 1.24 (0.60-2.62)                         | 2.09 (0.85-5.65)                                  | 1.11 (0.54-2.36)                                       |
| PDL1+Chemo                 | <b>2.49 (1.25-4.95)</b> | <b>2.46 (1.22-4.93)</b>         | <b>2.45 (1.18-5.03)</b>                           | <b>2.08 (1.00-4.34)</b>                    | <b>2.55 (1.24-5.24)</b>                         | <b>2.46 (1.17-5.08)</b>                  | <b>2.32 (1.13-4.77)</b>                           | <b>4.01 (1.75-9.36)</b>                                |
| CTLA4                      | <b>1.95 (1.10-3.51)</b> | <b>1.92 (1.07-3.50)</b>         | <b>1.91 (1.01-3.63)</b>                           | 2.09 (0.96-4.60)                           | 1.64 (0.84-3.24)                                | 1.84 (0.93-3.67)                         | 1.76 (0.89-3.48)                                  | <b>1.86 (1.06-3.33)</b>                                |
| CTLA4+Chemo                | 2.12 (0.85-5.37)        | 2.11 (0.84-5.34)                | 2.11 (0.82-5.52)                                  | 1.13 (0.18-7.50)                           | 2.85 (0.94-8.81)                                | 5.19 (0.30-204)                          | 2.70 (0.90-8.37)                                  | 2.24 (0.95-5.45)                                       |
| TTD                        | 1.17 (0.73-1.87)        | 1.12 (0.68-1.87)                | 1.16 (0.66-2.05)                                  | 1.30 (0.76-2.25)                           | 1.19 (0.71-2.00)                                | 1.23 (0.68-2.23)                         | 1.31 (0.71-2.45)                                  | 1.18 (0.76-1.84)                                       |
| Chemo                      | 1.34 (0.95-1.91)        | 1.33 (0.94-1.91)                | 1.34 (0.93-1.94)                                  | 1.12 (0.75-1.68)                           | 1.38 (0.95-2.00)                                | 1.34 (0.92-1.96)                         | 1.27 (0.87-1.85)                                  | 1.43 (1.00-2.05)                                       |
| Chemo+TTD                  | <b>2.07 (1.16-3.77)</b> | <b>2.04 (1.13-3.55)</b>         | <b>2.15 (1.08-4.37)</b>                           | <b>2.00 (1.01-4.01)</b>                    | <b>2.04 (1.11-3.81)</b>                         | <b>2.06 (1.11-3.89)</b>                  | <b>2.05 (1.09-3.97)</b>                           | <b>1.95 (1.13-3.44)</b>                                |
| Placebo                    | <b>0.37 (0.17-0.76)</b> | <b>0.37 (0.17-2.33)</b>         | <b>0.36 (0.16-0.76)</b>                           | <b>0.30 (0.11-0.76)</b>                    | <b>0.35 (0.15-0.74)</b>                         | <b>0.39 (0.16-0.87)</b>                  | <b>0.35 (0.15-0.73)</b>                           | <b>0.38 (0.18-0.74)</b>                                |
| PD1                        | Reference               | Reference                       | Reference                                         | Reference                                  | Reference                                       | Reference                                | Reference                                         | Reference                                              |
| DIC                        | 354                     | 339                             | 296                                               | 293                                        | 315                                             | 314                                      | 282                                               | 312                                                    |
| Number of studies          | 95                      | 90                              | 76                                                | 79                                         | 84                                              | 83                                       | 76                                                | 84                                                     |
| Heterogeneity <sup>a</sup> | 0.20 (0.09-0.40)        | 0.21 (0.09-0.43)                | 0.24 (0.10-0.48)                                  | 0.24 (0.10-0.48)                           | 0.24 (0.10-0.48)                                | 0.25 (0.10-0.51)                         | 0.24 (0.10-0.47)                                  | 0.13 (0.03-0.34)                                       |

<sup>a</sup> Heterogeneity was assessed using the posterior median between trial variance, tau<sup>2</sup>.

Significant results are in bold.

RAEs, renal adverse events; CTCAE, Common Terminology Criteria for Adverse Events; PRF, postrenal failure; CKD, chronic kidney disease; TTD, Targeted therapy drug; Chemo, Chemotherapy; PD-1, programmed cell death 1; PD-L1, programmed cell death ligand 1; CTLA4, cytotoxic T-lymphocyte antigen 4; DIC, deviance information criterion.
